# Supplementary material for: Local Resting Ca2+ Controls the Scale of Astroglial Ca2+ Signals
Source: PubMed Central journal article supplement (PMC7068654; doi:10.1016/j.celrep.2020.02.043), 2020-03-10
Supplement: mmc2.pdf [file mmc2.pdf]

# Cell Reports

## Local Resting $\text{Ca}^{2+}$ Controls the Scale of Astroglial $\text{Ca}^{2+}$ Signals

### Graphical Abstract

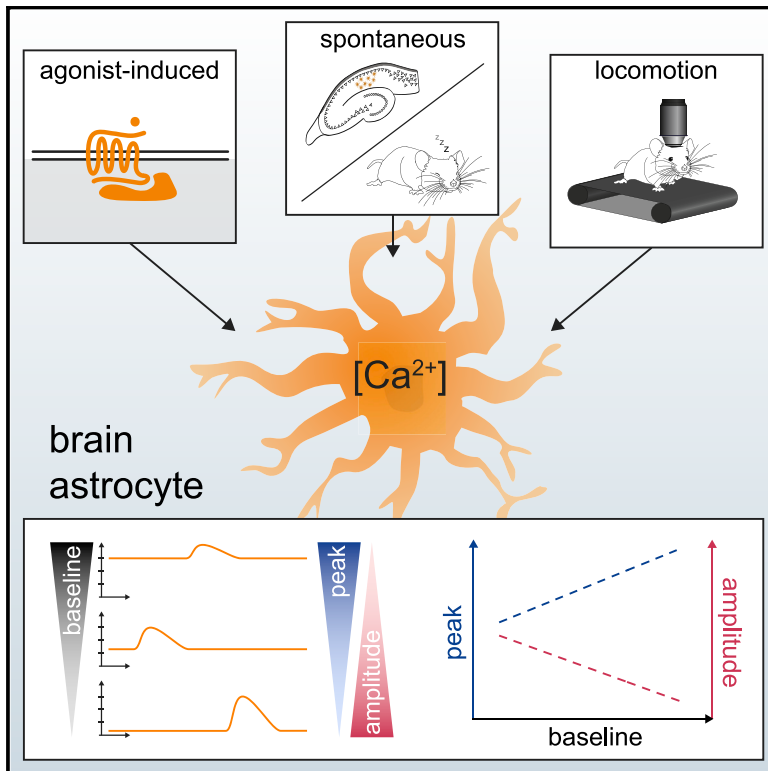

### Authors

Claire M. King, Kirsten Bohmbach, Daniel Minge, ..., Gabor C. Petzold, Dmitri A. Rusakov, Christian Henneberger

### Correspondence

christian.henneberger@uni-bonn.de

### In Brief

King et al. show that, in brain astroglia, a high resting  $[\text{Ca}^{2+}]$  increases the maximum level but decreases the amplitude of local  $\text{Ca}^{2+}$  signals. This fundamental relationship holds over a wide range of preparations, ranging from hippocampal astrocytes in acute slices to locomotion-associated  $\text{Ca}^{2+}$  signals in the awake animal.

### Highlights

- $\text{Ca}^{2+}$  signals in brain astroglia are controlled by the local basal  $[\text{Ca}^{2+}]$
- A high basal  $[\text{Ca}^{2+}]$  is associated with higher peak level but lower amplitude
- This rule applies to  $\text{Ca}^{2+}$  signals *in vitro* and *in vivo*
- Changing basal  $\text{Ca}^{2+}$  affects peak and amplitude of  $\text{Ca}^{2+}$  signals accordingly

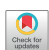

# Local Resting $\text{Ca}^{2+}$ Controls the Scale of Astroglial $\text{Ca}^{2+}$ Signals

Claire M. King,<sup>1,6</sup> Kirsten Bohmbach,<sup>2,6</sup> Daniel Minge,<sup>2</sup> Andrea Delekate,<sup>3</sup> Kaiyu Zheng,<sup>1</sup> James Reynolds,<sup>1</sup> Cordula Rakers,<sup>3</sup> Andre Zeug,<sup>4</sup> Gabor C. Petzold,<sup>3,5</sup> Dmitri A. Rusakov,<sup>1,7</sup> and Christian Henneberger<sup>1,2,3,7,8,\*</sup>

<sup>1</sup>Institute of Neurology, University College London, London, UK

<sup>2</sup>Institute of Cellular Neurosciences, Medical Faculty, University of Bonn, Bonn, Germany

<sup>3</sup>German Center for Neurodegenerative Diseases (DZNE), Bonn, Germany

<sup>4</sup>Cellular Neurophysiology, Hannover Medical School, Hannover, Germany

<sup>5</sup>Department of Neurology, University Hospital Bonn, Bonn, Germany

<sup>6</sup>These authors contributed equally

<sup>7</sup>Senior author

<sup>8</sup>Lead Contact

\*Correspondence: [christian.henneberger@uni-bonn.de](mailto:christian.henneberger@uni-bonn.de)

<https://doi.org/10.1016/j.celrep.2020.02.043>

## SUMMARY

Astroglia regulate neurovascular coupling while engaging in signal exchange with neurons. The underlying cellular machinery is thought to rely on astrocytic  $\text{Ca}^{2+}$  signals, but what controls their amplitude and waveform is poorly understood. Here, we employ time-resolved two-photon excitation fluorescence imaging in acute hippocampal slices and in cortex *in vivo* to find that resting  $[\text{Ca}^{2+}]$  predicts the scale (amplitude) and the maximum (peak) of astroglial  $\text{Ca}^{2+}$  elevations. We bidirectionally manipulate resting  $[\text{Ca}^{2+}]$  by uncaging intracellular  $\text{Ca}^{2+}$  or  $\text{Ca}^{2+}$  buffers and use ratiometric imaging of a genetically encoded  $\text{Ca}^{2+}$  indicator to establish that alterations in resting  $[\text{Ca}^{2+}]$  change co-directionally the peak level and anti-directionally the amplitude of local  $\text{Ca}^{2+}$  transients. This relationship holds for spontaneous and for induced (for instance by locomotion)  $\text{Ca}^{2+}$  signals. Our findings uncover a basic generic rule of  $\text{Ca}^{2+}$  signal formation in astrocytes, thus also associating the resting  $\text{Ca}^{2+}$  level with the physiological “excitability” state of astroglia.

## INTRODUCTION

Astroglial cells are an abundant, electrically non-excitable cell type that contribute to brain function via various mechanisms, including the maintenance of extracellular ion homeostasis, neurotransmitter uptake, neurovascular coupling, and reciprocal neuron-astroglia signaling. The key intracellular messenger in astroglia is  $\text{Ca}^{2+}$ . A multitude of signaling pathways enable astroglia to convert neuronal activity into cytosolic  $\text{Ca}^{2+}$  increases, which often involve  $\text{Ca}^{2+}$  stores (Bazargani and Attwell, 2016; Shigetomi et al., 2016; Volterra et al., 2014). In turn, an increase in intracellular  $\text{Ca}^{2+}$  triggers diverse cellular responses, such as  $\text{Ca}^{2+}$ -dependent neurotransmitter release from astroglia and neurovascular coupling (Araque et al., 2014; Nuriya and Hirase,

2016; Perea et al., 2009; Petzold and Murthy, 2011; Rusakov et al., 2014).

Recent advances in  $\text{Ca}^{2+}$  imaging have helped to reveal that astroglial  $\text{Ca}^{2+}$  transients vary extensively in their magnitude, intracellular location, and spatiotemporal dynamics (Bindocci et al., 2017; Di Castro et al., 2011; Kanemaru et al., 2014; Srinivasan et al., 2015), suggesting that astrocytes are fully equipped to provide graded, wide-bandwidth control of their  $\text{Ca}^{2+}$ -dependent actions. Indeed, it has long been shown that the rate of exocytosis and the fraction of released vesicles increases with greater  $\text{Ca}^{2+}$  mobilization in cultured astroglia (Kreft et al., 2004; Pryazhnikov and Khiroug, 2008) and that astroglial glutamate release depends on the magnitude of  $\text{Ca}^{2+}$  entry (Papura and Haydon, 2000). Graded effects of astrocytic  $\text{Ca}^{2+}$  elevations on neural function have since been reported in various brain regions, *in situ* and *in vivo* (reviewed in Bazargani and Attwell, 2016; Volterra et al., 2014). Similarly, graded astroglial  $[\text{Ca}^{2+}]$  signals can control blood vessel diameters and blood flow (Lind et al., 2013; Mishra et al., 2016; Mulligan and MacVicar, 2004).

Clearly, the amplitude and extent of transient  $[\text{Ca}^{2+}]$  changes are driven by multiple molecular mechanisms operating in astrocytes, such as  $\text{Ca}^{2+}$  release from intracellular stores, mitochondria, or via channel-mediated  $\text{Ca}^{2+}$  entry (Agarwal et al., 2017; Araque et al., 2014; Bazargani and Attwell, 2016; Verkhratsky and Nedergaard, 2018; Volterra et al., 2014). Given the multiplicity of astrocytic cellular mechanisms contributing to  $\text{Ca}^{2+}$  signaling, the question arises whether there are any unifying physiological principles that shape the waveform of  $\text{Ca}^{2+}$  elevations in astroglia.

Intriguingly, several lines of experimental evidence suggest that the cytosolic resting  $[\text{Ca}^{2+}]$  could be a key player here. First, resting  $[\text{Ca}^{2+}]$  in astroglia can be modulated by neuronal activity in rat somatosensory cortex slices (Mehina et al., 2017) and hippocampal slice cultures (Jackson and Robinson, 2015) and by dopamine in acute hippocampal slices (Jennings et al., 2017). In cortical astroglia *in vivo*, basal  $[\text{Ca}^{2+}]$  shows a heterogeneous distribution pattern within and among cells (Zheng et al., 2015) and is globally elevated in a mouse model of Alzheimer’s disease (Kuchibhotla et al., 2009).

Second,  $\text{Ca}^{2+}$  entry into the astroglial cytosol from the endoplasmic reticulum (ER) via inositol 1,4,5-trisphosphate

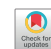

receptors (IP3Rs) is determined by the receptor opening probability, which has a bell-shaped dependence on cytosolic  $[Ca^{2+}]$  (Bezprozvanny et al., 1991; Foskett et al., 2007). Thus, an increase of the resting  $[Ca^{2+}]$  from low values could boost IP3R-dependent astroglial  $[Ca^{2+}]$  transients, whereas relatively high resting  $[Ca^{2+}]$  may dampen their amplitude.

Third, the resting  $[Ca^{2+}]$  sets the degree to which endogenous intracellular  $Ca^{2+}$  buffers are occupied by  $Ca^{2+}$ . For instance, lowering the resting  $[Ca^{2+}]$  sharply increases the proportion of endogenous buffers that can effectively curtail the extent of free cytosolic  $[Ca^{2+}]$  transients and vice versa. Indeed, in neurons,  $Ca^{2+}$  buffer saturation has been shown to contribute to the facilitation of  $Ca^{2+}$ -dependent release during repetitive stimulation (Klingauf and Neher, 1997; Scott and Rusakov, 2006; Vyleta and Jonas, 2014). This suggests that an increase of astroglial resting  $[Ca^{2+}]$  could partly saturate endogenous  $Ca^{2+}$  buffers and thereby increase the amplitude of cytosolic  $Ca^{2+}$  transients.

Thus, our hypothesis was that resting  $Ca^{2+}$  levels could be an important determinant of  $Ca^{2+}$  signal generation in astrocytes. To test this hypothesis, we investigated the relationship between astroglial resting  $[Ca^{2+}]$  and  $[Ca^{2+}]$  transients *in vitro* and *in vivo* by employing ratiometric fluorescence intensity measurements of genetically encoded  $Ca^{2+}$  indicators and fluorescence lifetime imaging (FLIM) of organic  $Ca^{2+}$  indicators. We combined these measurements with photolytic release of  $Ca^{2+}$  and  $Ca^{2+}$  buffers inside individual astrocytes to establish a causal relationship between astroglial resting  $[Ca^{2+}]$  and astroglial  $[Ca^{2+}]$  transients.

## RESULTS

### Resting $[Ca^{2+}]$ Predicts Maximum (Peak) and Amplitude of Evoked Astroglial $Ca^{2+}$ Transients *In Situ*

The  $Ca^{2+}$  dependence of the fluorescence lifetime of dyes from the Oregon Green BAPTA family was used to accurately measure  $[Ca^{2+}]$  in astroglia *in situ* and *in vivo* by performing FLIM (Agronskaia et al., 2004; Kuchibhotla et al., 2009; Wilms et al., 2006; Zheng et al., 2015). We chose Oregon Green 488 BAPTA-2 (OGB2) because of its relatively high molecular weight of ~1.5 kDa, which makes OGB2 less likely to escape via gap junctions into neighboring astrocytes, thereby keeping its concentration high in the small peripheral branches of astrocytes.

First, OGB2 lifetime measurements (time-correlated single photon counting [TCSPC]) were calibrated for free  $Ca^{2+}$  (Figure 1A). For analyses, the time-resolved OGB2 fluorescence decay was split in two time windows ( $C_1$  and  $C_2$ ), in which the numbers of detected photons were counted before their ratio was taken (photon count ratio; Figure 1A, right panel). This photon count ratio displayed a strong dependence on  $[Ca^{2+}]$ : the advantages of this ratiometric measure over the conventional multi-exponential approximation of lifetime decay have been demonstrated (Zheng et al., 2015). It was therefore used to quantify OGB2 fluorescence decay and to translate it into  $[Ca^{2+}]$  (Figures 1B and S1; STAR Methods).

To monitor astroglial  $Ca^{2+}$  signaling in CA1 *stratum radiatum* of the hippocampus, we loaded OGB2 (200  $\mu$ M) via a whole-cell patch pipette into astrocytes. After an equilibration period of

10–20 min, astroglial  $Ca^{2+}$  transients were evoked by pressure application of the mGluR agonist DHPG from a pipette placed immediately adjacent to the astrocyte territory while collecting OGB2 fluorescence (Figure 1C). We used mGluR activation because it reliably induces astroglial  $Ca^{2+}$  signaling in the hippocampus (Porter and McCarthy, 1996; Sherwood et al., 2017; Tang et al., 2015). For analyses, a square grid of the regions of interest (ROIs) was automatically defined (Figure 1D, left); the time course of  $[Ca^{2+}]$  was determined in each ROI (Figure 1D; STAR Methods); and the resting  $[Ca^{2+}]$  before the DHPG application, the peak  $[Ca^{2+}]$  of the response, and their difference, i.e., the response amplitude, were calculated. Notwithstanding the well-known complexities of  $Ca^{2+}$  signal propagation in astrocytes, the ROI-based approach was specifically selected to report the relationship between local resting  $Ca^{2+}$  and the amplitude and peak of the local transient, regardless of its origin.

The baseline/resting  $[Ca^{2+}]$  displayed considerable variability between regions of an individual cell (Figure 1E), with an average coefficient of variation (CV) of  $0.36 \pm 0.033$  ( $n = 12$ ) and an average mean of  $62.7 \pm 9.64$  nM (standard deviation 33.4 nM;  $n = 12$ ), consistent with previous observations (Zheng et al., 2015). If these variations of baseline  $[Ca^{2+}]$  have a role in determining the amplitude of  $[Ca^{2+}]$  transients or their peak  $[Ca^{2+}]$ , DHPG-induced responses should depend on the local baseline  $[Ca^{2+}]$ . To identify an association, if any, between measured  $[Ca^{2+}]$  parameters without any assumptions about their exact mathematical relationships, we used the standard Spearman's rank correlation (see also Quantification and Statistical Analysis in STAR Methods). We calculated the Spearman's rank correlation coefficient (R) between the resting  $[Ca^{2+}]$ , the peak  $[Ca^{2+}]$  (maximum elevation), and the amplitude (concentration increase with respect to the baseline/resting level) to capture dependencies across a recorded astrocyte (Figure 1F). On average, across all cells, the resting/baseline  $[Ca^{2+}]$  and the peak  $[Ca^{2+}]$  were positively correlated, whereas a negative correlation between baseline  $[Ca^{2+}]$  and the amplitude of DHPG-induced  $Ca^{2+}$  transients was detected (Figures 1G and S3A–S3C for a direct comparison of peaks and amplitudes between high and low baseline  $[Ca^{2+}]$ ). Where detected, progressive decreases in  $Ca^{2+}$  transient amplitudes were not due to saturation of OGB2, because the maximum peak  $[Ca^{2+}]$  observed in a cell, averaged across the entire population, was  $191.2 \pm 38.2$  nM. This is equivalent to photon count ratios about halfway between their minimum and maximum (Figure 1B; ~57%) and well below the estimated affinity of OGB2 for  $Ca^{2+}$  (580 nM; ThermoFisher). We also tested whether variations of the resting  $[Ca^{2+}]$  could influence the kinetics of  $Ca^{2+}$  transient, which was however not the case (Figure S2). Thus, inside individual astroglia, a higher resting  $[Ca^{2+}]$  predicts a higher peak  $[Ca^{2+}]$  and lower amplitudes of  $Ca^{2+}$  transients triggered by mGluR activation.

### Resting $[Ca^{2+}]$ versus Intracellular Location

We next asked whether this finding can be explained by local astrocyte morphology. Because the fine structural details cannot be resolved by diffraction-limited two-photon excitation microscopy (Heller and Rusakov, 2015), we used the local fraction of tissue volume (volume fraction [VF]) occupied by astrocyte branches as a measure of local morphology

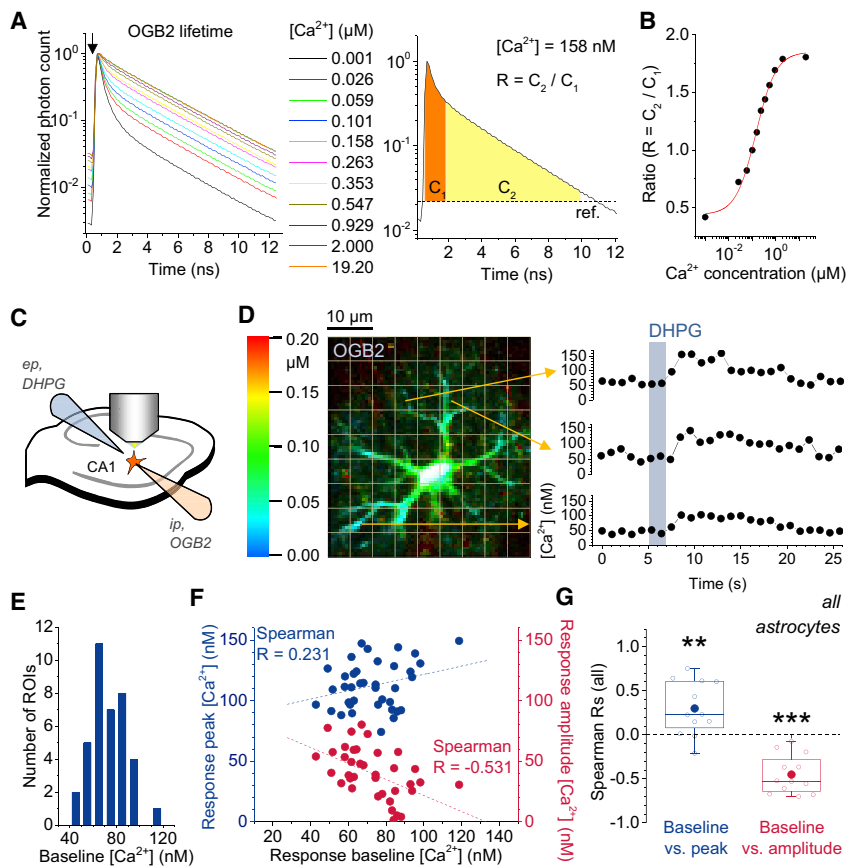

**Figure 1. Variable Subcellular and Intercellular Astroglial Resting/Baseline  $[Ca^{2+}]$  Determines  $Ca^{2+}$  Transient Properties**

(A) The fluorescence lifetime of the  $Ca^{2+}$  indicator OGB2 depends on  $[Ca^{2+}]$  (left panel; cuvette). Shown is the normalized photon count rate measured by time-correlated single-photon counting (TCSPC) relative to the laser pulse (arrow). The  $[Ca^{2+}]$  dependence of OGB2 lifetime was quantified (right panel; example for  $[Ca^{2+}] = 158$  nM) by calculating the ratio (R) of the number of photons (C) detected in two time windows (C1, orange; C2, yellow).

(B) The relationship of the ratio R and  $[Ca^{2+}]$  was approximated by a logistic function to translate ratios obtained in  $Ca^{2+}$  imaging experiment into  $Ca^{2+}$  concentrations.

(C) Schematic of the recording configuration for acute slices. Recordings were performed in the *stratum radiatum* of the hippocampal CA1 region. Individual astroglial cells were filled with the  $Ca^{2+}$ -sensitive fluorescent dye OGB2 via the whole-cell patch-clamp pipette (ip, intracellular pipette). Astroglial  $Ca^{2+}$  responses were evoked by pressure application of extracellular solution containing the mGluR agonist DHPG (300  $\mu$ M) and Alexa Fluor 647 (3  $\mu$ M; for visualizing the puff) in the immediate vicinity of the cell using an extracellular pipette (ep). (D) Illustration of a sample recording. Image of an OGB2-filled astrocytes (left panel;  $[Ca^{2+}]$  color-coded according to scale; brightness corresponds to fluorescence intensity; grid outlines regions of interest [ROIs]). Application of DHPG (right panel) by a short pressure pulse reliably induced  $[Ca^{2+}]$  transients throughout the astrocyte (3 sample ROIs as indicated by arrows).

(E) The resting  $[Ca^{2+}]$  varies considerably across the ROIs (example from D).

(F) The relationship between the  $[Ca^{2+}]$  before the DHPG puff and the peak  $[Ca^{2+}]$  of the transients (blue) and the transient amplitude (red) was quantified by calculating the Spearman rank correlation coefficient (R) (38 ROIs; same cell as in D and E).

(G) Over all experiments, the Rs were positive for the baseline  $[Ca^{2+}]$  and transient peak  $[Ca^{2+}]$  ( $p = 0.0060$ ) and negative for baseline  $[Ca^{2+}]$  and the transient amplitude ( $p < 0.0001$ ;  $n = 11$  for both; one-population two-sided Student's t tests). Each point represents a recording from one astrocyte.

(Medvedev et al., 2014; Savtchenko et al., 2018). The local VF was calculated for each ROI by normalizing the local Alexa Fluor 594 fluorescence intensity to the somatic values. This VF is highest at the soma (100%), low if the ROI is occupied by thin astrocyte branches, and intermediate if ROIs contain larger branches and thin processes. For each astrocyte, we then compared the local VF with the baseline  $[Ca^{2+}]$ , the transient peak  $[Ca^{2+}]$ , and the amplitude. The average R between VF and baseline  $[Ca^{2+}]$  indicated no significant correlation (mean  $R = 0.106 \pm 0.0864$ ;  $n = 11$ ;  $p = 0.247$ ; one-population Student's t test). This result suggested that the baseline  $[Ca^{2+}]$  is not primarily determined by local astrocyte morphology. In contrast, we found negative correlations between the local VF and peak  $[Ca^{2+}]$  ( $R = -0.234 \pm 0.0842$ ;  $p = 0.0191$ ;  $n = 11$ ; one-population Student's t test) and between VF and the amplitude ( $R = -0.285 \pm 0.0779$ ;  $p = 0.00435$ ;  $n = 11$ ; one-population Student's t test). The latter observation indicates that, independently of baseline  $[Ca^{2+}]$ , the amplitude and peak  $[Ca^{2+}]$  of mGluR-dependent transients are higher when the local VF is low, i.e., in the small astrocyte branches.

These experiments establish that astroglial compartments with higher resting  $[Ca^{2+}]$  display transients with a higher peak  $[Ca^{2+}]$ , but lower amplitudes, within individual cells. Higher baseline  $[Ca^{2+}]$  could decrease  $Ca^{2+}$  entry into the astrocyte cytosol by reducing  $Ca^{2+}$  influx either from extracellular space or from  $Ca^{2+}$  stores. Theory dictates that 50 nM changes in basal  $[Ca^{2+}]$  lead to only  $<10\%$  changes in its extracellular driving force (Figure S3D). In contrast, a significant decrease of the driving force for  $Ca^{2+}$  entry from internal  $Ca^{2+}$  stores appears plausible, depending on the estimates of the  $Ca^{2+}$  store membrane potential and intra-store  $[Ca^{2+}]$  (Figures S3E and S3F). In addition, full equilibration of  $Ca^{2+}$  between the astrocyte cytosol and intracellular  $Ca^{2+}$  stores during a cytosolic  $Ca^{2+}$  transient could lead to a decrease of  $Ca^{2+}$  transient amplitudes at high-baseline basal  $[Ca^{2+}]$  (Figure S4). This would again depend on the exact relative volumes and relative  $[Ca^{2+}]$  between cytosol and intracellular  $Ca^{2+}$  stores.

Irrespective of the underlying mechanism, these results demonstrate a clear correlation between resting  $Ca^{2+}$  and evoked  $Ca^{2+}$  transients. However, they do not establish the underlying causality. Therefore, we next asked whether controlled

manipulation of resting  $[Ca^{2+}]$  would predictably affect transient  $Ca^{2+}$  signaling.

### Induced Changes in Resting $[Ca^{2+}]$ Bidirectionally Regulate Evoked $Ca^{2+}$ Signals Transients *In Situ*

Two experimental approaches were used to manipulate the baseline  $[Ca^{2+}]$  of astrocytes within the observed physiological range (Figures 1E and 1F). To lower the baseline  $[Ca^{2+}]$ , the light-sensitive  $Ca^{2+}$  chelator diazo-2 (2.5 mM) was added to the intracellular solution: UV photolysis of diazo-2 drastically increases its affinity for  $Ca^{2+}$  (decrease of  $K_D$  from  $\sim 2.2 \mu M$  to  $\sim 73$  nM; Adams et al., 1989). A brief UV exposure of diazo-2-filled astrocytes indeed robustly decreased the baseline  $[Ca^{2+}]$  (Figure 2A). In a complementary set of tests, we sought to increase the baseline  $[Ca^{2+}]$  by adding an equilibrated mixture of the photolysable  $Ca^{2+}$  chelator NP-EGTA (5 mM) and  $CaCl_2$  (3 mM) to the intracellular solution and using UV illumination to release  $Ca^{2+}$  (Fellin et al., 2004). This reliably induced a significant increase of the baseline  $[Ca^{2+}]$  in astrocytes (Figure 2B).

We then asked how the evoked  $Ca^{2+}$  transients were affected by manipulating the baseline  $[Ca^{2+}]$  (Figure 2C). From our previous recordings, we expected that increasing the local baseline  $[Ca^{2+}]$  should increase the  $[Ca^{2+}]$  transient peak and decrease the amplitude. To test this,  $Ca^{2+}$  transients evoked by DHPG before and after changing the baseline  $[Ca^{2+}]$  were compared, in each recording and each ROI (Figures 1D and 2C). The corresponding changes of the baseline  $[Ca^{2+}]$ , the transient peak  $[Ca^{2+}]$ , and the amplitude were documented. In each astrocyte, the R between these changes was computed (see Figure 2D, top and middle panels, one-cell example). In recordings using NP-EGTA, we did find a positive correlation between the changes of baseline  $[Ca^{2+}]$  and transient peak  $[Ca^{2+}]$ , and a negative correlation between the changes of baseline  $[Ca^{2+}]$  and the amplitude (Figure 2D, bottom panel). Similar results were obtained in recordings employing photolysis of diazo-2. Here, a decrease of baseline  $[Ca^{2+}]$  was associated with a decrease of peak  $[Ca^{2+}]$  and an increase of the amplitude (Figure 2E). Note that photolysis of either diazo-2 or NP-EGTA changes the overall concentration and properties of mobile  $Ca^{2+}$  buffers throughout the cell, which may globally decrease or increase, respectively, the DHPG-induced  $[Ca^{2+}]$  amplitudes and peaks. This does not affect correlations between local regions of interest within single cells as performed here.

Fully consistent with our initial observations, these findings indicate that changes in the local resting  $[Ca^{2+}]$  are sufficient to alter both the peak  $[Ca^{2+}]$  and the amplitude of DHPG-evoked  $Ca^{2+}$  transients: a local increase of baseline  $[Ca^{2+}]$  leads to an increased peak  $[Ca^{2+}]$  and decreased amplitude.

### Spontaneous Astroglial $Ca^{2+}$ Transients Depend on Resting $[Ca^{2+}]$ *In Situ*

Although DHPG pressure application reliably evoking timed astroglial  $Ca^{2+}$  transients, it might engage  $Ca^{2+}$  signaling cascades that differ from those endogenously active. We therefore next analyzed  $Ca^{2+}$  transients spontaneously occurring during FLIM imaging (Figure 3), without any pharmacological stimulation. Spontaneous transients were analyzed in manually selected ROIs ( $\sim 3 \times 3 \mu m^2$ ) and occurred at an average frequency of

$1.40 \pm 0.159$  events per minute ( $n = 7$ ; Figure 3A). On average, the measured pre-event baseline  $[Ca^{2+}]$  was  $29.3 \pm 11.6$  nM and the peak  $[Ca^{2+}]$  was  $50.9 \pm 15.3$  nM ( $n = 8$ ). Note that these are free  $Ca^{2+}$  concentration estimates in the presence of  $200 \mu M$  added exogenous buffer (OGB2) and that the free cytosolic  $Ca^{2+}$  concentration may rise much further in its absence.

How do these measurements compare with those reported elsewhere?  $Ca^{2+}$  transients are often quantified by normalizing the fluorescence intensity of the  $Ca^{2+}$  indicator at the peak to its pre-event baseline value ( $F_P/F_0$ ). Assuming that the fluorescence of the  $Ca^{2+}$ -free indicator is negligible (e.g., Fluo-4),  $F_P/F_0$  can be derived from the law of mass action to be  $[Ca^{2+}]_P \times (K_D + [Ca^{2+}]_0) / ([K_D + [Ca^{2+}]_P] \times [Ca^{2+}]_0)$ , where  $K_D$  is the indicator's dissociation constant and  $[Ca^{2+}]_0$  (baseline) and  $[Ca^{2+}]_P$  (peak) correspond to  $F_P$  and  $F_0$ . Using a  $K_D$  of 350 nM for Fluo-4, our measurements correspond to  $F_P/F_0$  values of  $1.86 \pm 0.118$  ( $n = 8$ ; range = 1.29–2.23), which is well within the range of published data, both *in vitro* and *in vivo* (Hirase et al., 2004; Navarrete and Araque, 2008).

Spontaneous  $Ca^{2+}$  transients very rarely occurred in the same region more than once during 5–10 min. We could therefore not test how the UV uncaging of  $Ca^{2+}$  and  $Ca^{2+}$  buffers affect spontaneous  $Ca^{2+}$  transients in the same ROI. Instead, we analyzed the correlations between baseline  $[Ca^{2+}]$ , transient peak  $[Ca^{2+}]$ , and the amplitude across all transients recorded in individual cells (Figures 3A and 3B). Like DHPG-evoked  $Ca^{2+}$  transients, we found that a higher resting  $[Ca^{2+}]$  was associated with a higher peak  $[Ca^{2+}]$  and lower amplitude (Figure 3C).

In summary, peak  $[Ca^{2+}]$  and amplitude of spontaneous, endogenously generated  $Ca^{2+}$  transients display the same dependence on the pre-event local resting  $[Ca^{2+}]$  as DHPG-evoked responses. This confirms that the pre-transient baseline or resting  $[Ca^{2+}]$  controls astroglial  $[Ca^{2+}]$  transients.

### Control of $Ca^{2+}$ Transients by Resting $[Ca^{2+}]$ Is a Ubiquitous Phenomenon

Do our findings faithfully reflect the role of resting  $[Ca^{2+}]$  in controlling  $Ca^{2+}$  signals in astrocytes unperturbed by whole-cell patch-clamp recordings and *in vivo*? Genetically encoded  $Ca^{2+}$  indicators have greatly facilitated the analysis of astroglial  $Ca^{2+}$  signaling, especially *in vivo* (Bindocci et al., 2017; Gee et al., 2014; Kanemaru et al., 2014; Shigetomi et al., 2010). Because the routinely used GCaMP-type indicators display little to no lifetime changes upon  $Ca^{2+}$  binding (Akerboom et al., 2012), they are not suitable for FLIM  $Ca^{2+}$  imaging. On their own, these  $Ca^{2+}$  indicators also do not lend themselves to quantitative comparisons of baseline  $Ca^{2+}$  and  $Ca^{2+}$  transients, because their fluorescence intensity depends on both the  $Ca^{2+}$  and the indicator concentration in a ROI. The latter varies among ROIs within the same astrocyte, because the imaged volume is only partially occupied by astrocyte cytosol and this fraction changes from one ROI to another, i.e., the local astrocyte VF varies over the cell's territory.

Therefore, we used a mouse line that conditionally expresses the  $Ca^{2+}$  indicator GCaMP5g and the  $Ca^{2+}$ -insensitive fluorescent protein tdTomato in the astroglial cytosol upon Cre recombinase expression (Gee et al., 2014). After cross-breeding with a GLASTcreERT2 mouse line (Mori et al., 2006) and tamoxifen

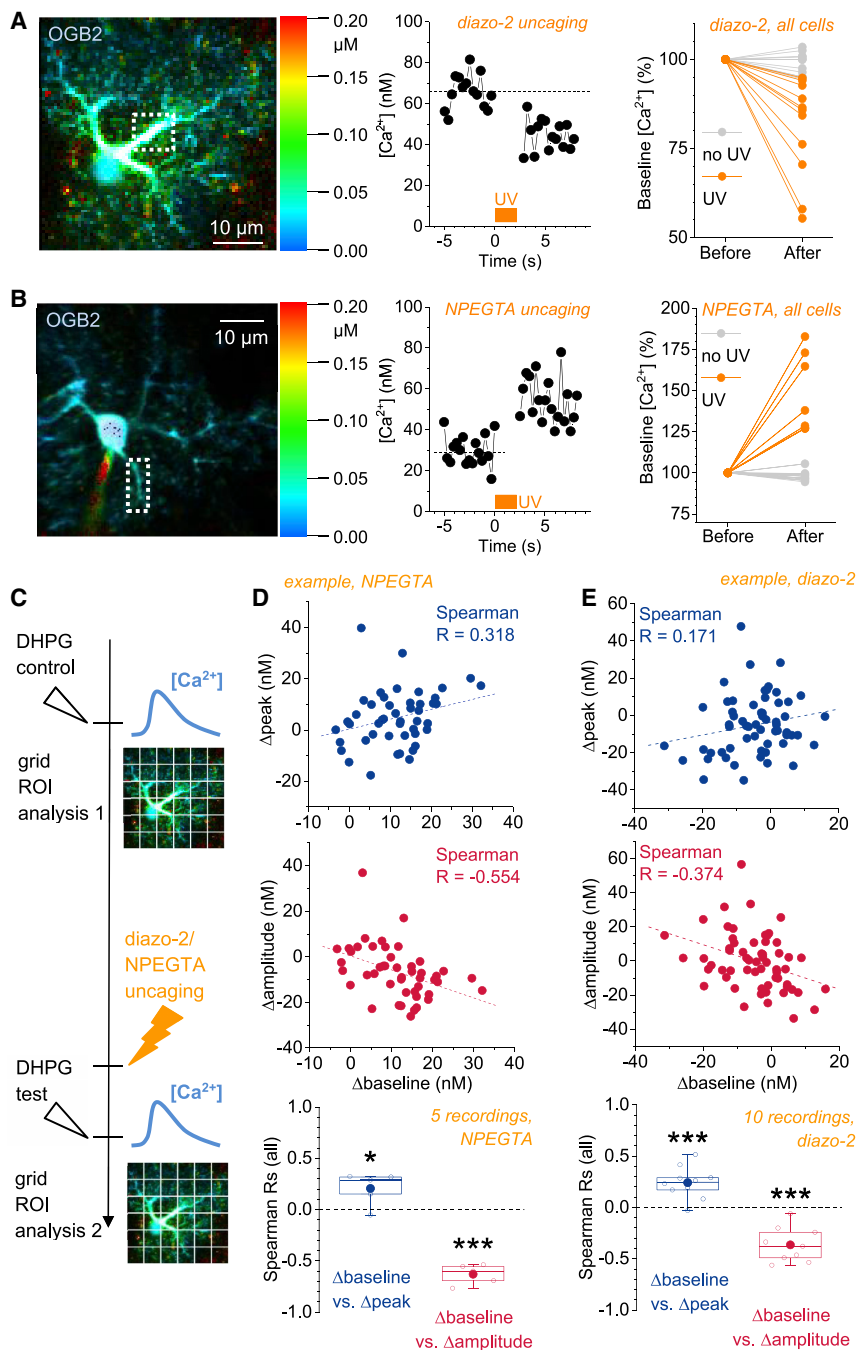

**Figure 2. Induction of Bidirectional Changes of the Local Astroglial Baseline  $[Ca^{2+}]$  Modifies Evoked  $Ca^{2+}$  Transients**

(A) The basal  $[Ca^{2+}]$  concentration was reliably lowered by photolysis of diazo-2 (included in the intracellular patch clamp solution). Example of an astroglial  $Ca^{2+}$  landscape before UV illumination is shown (left panel; dashed box represents example ROI; FLIM  $Ca^{2+}$  imaging throughout). The  $[Ca^{2+}]$  decreased by  $\sim 20$  nM upon UV illumination (same ROI, middle panel; orange bar indicates UV exposure). UV exposure significantly reduced the overall  $Ca^{2+}$  concentration in the astrocyte by  $19.3\% \pm 4.20\%$  ( $n = 11$ ;  $p < 0.001$ ; one-population Student's t test), whereas no change was detected by including diazo-2 only (without UV;  $1.26\% \pm 0.953\%$ ;  $n = 11$ ;  $p = 0.218$ ; one-population Student's t test). In experiments with UV photolysis of diazo-2, the time window of analysis corresponds to the baseline period of the 2<sup>nd</sup> DHPG puff (see C and E).

(B) Photolysis of the  $Ca^{2+}$  cage NP-EGTA increased the baseline  $[Ca^{2+}]$ . Same layout as in (A). UV illumination significantly increased the overall baseline  $[Ca^{2+}]$  in the astrocyte (UV:  $+46.1\% \pm 8.3\%$ ,  $n = 8$ ,  $p < 0.001$ , one-population Student's t test; no UV:  $-1.86\% \pm 1.21\%$ ,  $n = 8$ ,  $p = 0.169$ , one-population Student's t test). In experiments with UV photolysis of NP-EGTA, the time window of analysis corresponds to the baseline period of the 2<sup>nd</sup> DHPG puff (see C and D).

(C) Timeline of the experiment. A first  $Ca^{2+}$  transient was evoked by pressure application of DHPG.  $[Ca^{2+}]$  baseline, peak, and amplitude were determined for every ROI in a grid, like in Figure 1 (example image here, not experimental data). Then, either diazo-2 or NP-EGTA was photolysed by UV illumination. A second  $Ca^{2+}$  transient was evoked 6–10 s after photolysis. Again,  $[Ca^{2+}]$  baseline, peak, and amplitude were determined for every ROI in a grid. For each ROI with a DHPG response bigger than 6 nM, we then calculated the change of  $[Ca^{2+}]$  baseline, peak, and amplitude between before and after uncaging (after–before,  $\Delta$ baseline,  $\Delta$ peak, and  $\Delta$ amplitude). In control experiments without UV photolysis, the amplitude of the DHPG-induced  $Ca^{2+}$  transients changed by  $1.62\% \pm 12.1\%$  from one DHPG puff to the next ( $n = 7$ ;  $p = 0.75$ ; paired Student's t test).

(D) NPEGTA uncaging. The changes of the pre-event baseline  $[Ca^{2+}]$ , the peak  $[Ca^{2+}]$ , and the amplitude were calculated (as in D,  $\Delta$ baseline,  $\Delta$ peak, and  $\Delta$ amplitude) and correlated in each cell (R). Top and middle panels: an example recording displays changes of peak and amplitude versus baseline  $[Ca^{2+}]$  changes within individual ROIs from a single recording. A reduction of overall baseline  $[Ca^{2+}]$  from 35.8 nM to 31.0 nM was induced in this example. Bottom panel: Rs for all experiments show that a decrease of baseline  $[Ca^{2+}]$  is accompanied by a decreased peak  $[Ca^{2+}]$  and increased amplitude of DHPG-evoked  $Ca^{2+}$  transients ( $n = 10$ ;  $\Delta$ baseline versus  $\Delta$ peak  $R = +0.241 \pm 0.0491$ ,  $p < 0.001$ ;  $\Delta$ baseline versus  $\Delta$ amplitude  $R = -0.365 \pm 0.0505$ ,  $p < 0.001$ ; one-population Student's t tests). Each data point represents a recording from one astrocyte.

(E) Diazo-2 uncaging. The changes of the pre-event baseline  $[Ca^{2+}]$ , the peak  $[Ca^{2+}]$ , and the amplitude were calculated (as in D,  $\Delta$ baseline,  $\Delta$ peak, and  $\Delta$ amplitude) and correlated in each cell (R). Top and middle panels: an example recording displays changes of peak and amplitude versus baseline  $[Ca^{2+}]$  changes within individual ROIs from a single recording. A reduction of overall baseline  $[Ca^{2+}]$  from 35.8 nM to 31.0 nM was induced in this example. Bottom panel: Rs for all experiments show that a decrease of baseline  $[Ca^{2+}]$  is accompanied by a decreased peak  $[Ca^{2+}]$  and increased amplitude of DHPG-evoked  $Ca^{2+}$  transients ( $n = 10$ ;  $\Delta$ baseline versus  $\Delta$ peak  $R = +0.241 \pm 0.0491$ ,  $p < 0.001$ ;  $\Delta$ baseline versus  $\Delta$ amplitude  $R = -0.365 \pm 0.0505$ ,  $p < 0.001$ ; one-population Student's t tests). Each data point represents a recording from one astrocyte.

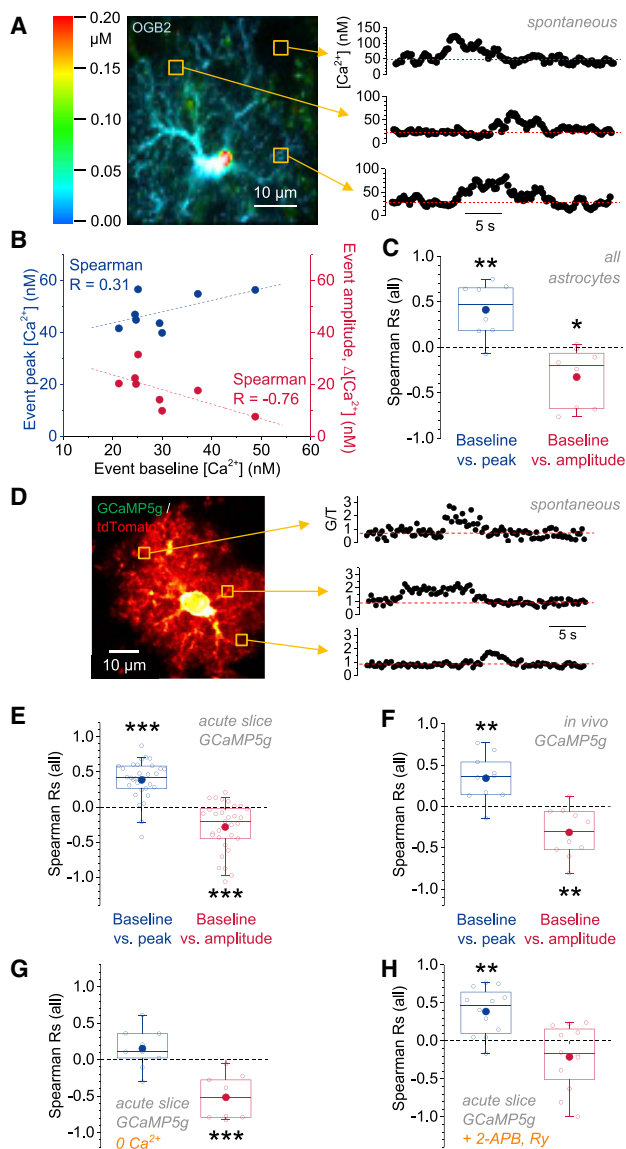

**Figure 3. Amplitude and Peak  $[Ca^{2+}]$  of Spontaneous Astroglia  $Ca^{2+}$  Transients Vary with Resting  $[Ca^{2+}]$**

(A) Sample FLIM  $Ca^{2+}$  recording with  $[Ca^{2+}]$  landscape and three sample ROIs (left panel). Three examples of  $[Ca^{2+}]$  transients from the indicated ROIs (right panel) are shown. Note that these transients did not occur simultaneously but have been roughly aligned for illustration purposes. Dashed red line indicates resting/baseline  $[Ca^{2+}]$  before the event.

(B) Correlation of spontaneous transient (event) baseline  $[Ca^{2+}]$  and peak  $[Ca^{2+}]$  (blue) and amplitude (red) for the example shown in (A). Rs are shown. Each data point represents data from an individual event and ROI.

(C) Overall, Rs reveal that higher pre-event baselines  $[Ca^{2+}]$  are associated with higher peak  $[Ca^{2+}]$  and lower amplitudes of spontaneous transients ( $n = 8$ ; baseline versus peak:  $R = +0.413 \pm 0.106$ ,  $p = 0.0059$ ; baseline versus amplitude:  $R = -0.325 \pm 0.114$ ,  $p = 0.025$ ; one-population Student's t tests). Each point represents a FLIM recording from one astrocyte.

(D) To confirm these findings in astrocytes not perturbed by whole-cell patch clamp, transgenic mouse lines were used that express the genetically encoded  $Ca^{2+}$  indicator GCaMP5g (G) and the fluorescent protein tdTomato (T) in astrocytes (left panel; example of tdTomato-expressing astrocyte with ROIs, boxes). Spontaneous  $Ca^{2+}$  transients were observed and quantified

injection, robust and astrocyte-specific expression of GCaMP5g and tdTomato was observed in the CA1 *stratum radiatum*. Because the concentration ratio of cytosol-soluble GCaMP5g and tdTomato should be constant throughout an astrocyte cytosol, we used their fluorescence intensity ratio (G/T; background corrected) to monitor intracellular  $[Ca^{2+}]$  and its transient changes in an unbiased and consistent way throughout a cell.

We first performed this analysis on spontaneous  $Ca^{2+}$  transients recorded from acute slices (Figure 3D). Rs were calculated between the pre-event baseline  $G_B/T$  and the  $Ca^{2+}$  transient peak  $G_P/T$  and the amplitude  $G_P/T - G_B/T$  for each recorded cell. Because GCaMP5g fluorescence is non-linearly related to the cytosolic  $[Ca^{2+}]$ , we corrected Rs obtained from these recordings (Figure S5). Again, the resting  $[Ca^{2+}]$  was positively correlated with the  $Ca^{2+}$  transient peak and negatively with the signal amplitude (Figure 3E). Having established these recordings, we performed *in vivo* recordings in the somatosensory cortex  $\sim 100$ – $200 \mu m$  below the cortical surface using a similar transgenic mouse line conditionally expressing GLASTcreER (Wang et al., 2012) and GCaMP5g/tdTomato (Gee et al., 2014) and obtained qualitatively identical results (Figure 3F). The control of astroglial  $Ca^{2+}$  transients by the local resting  $Ca^{2+}$  is therefore a robust phenomenon that can be observed using

after calculation of the background-corrected fluorescence intensity ratio G/T. Sample  $Ca^{2+}$  transients are shown in the right panel (not occurring simultaneously; roughly aligned in time for illustration). Red dashed lines indicate pre-event baseline  $G_B/T$ .

(E) Acute slice recordings. Left: all Rs between pre-event resting  $G_B/T$  and transient peak  $G_P/T$  (blue;  $R = +0.386 \pm 0.0488$ ;  $***p = 8.2 \times 10^{-9}$ ; one-population Student's t test). Right: all Rs between pre-event  $G_B/T$  and transient amplitude  $G_P/T - G_B/T$  after correction are shown (red;  $R = -0.285 \pm 0.0622$ ;  $***p = 7.4 \times 10^{-5}$ ; one-population Student's t test). For correction, see Figure S5. Data points represent Rs from individual cells (for both  $n = 31$  from 31 slices from more than seven animals).

(F) *In vivo* recordings of spontaneous  $Ca^{2+}$  transients from astrocytes expressing GCaMP5g and tdTomato ( $n = 10$  from five anesthetized mice). Left: Rs calculated between pre-event baseline  $G_B/T$  and transient peak  $G_P/T$  are shown (blue;  $R = +0.340 \pm 0.0875$ ;  $**p = 0.0037$ ; one-population Student's t test). Right: Rs of pre-event  $G_B/T$  and transient amplitude  $G_P/T - G_B/T$  after correction are shown (red;  $R = -0.315 \pm 0.0940$ ;  $**p = 0.0085$ ; one-population Student's t test). For correction, see Figure S5. Data points represent Rs from individual cells ( $n = 10$  astrocytes from three animals).

(G) Acute slice recordings of spontaneous  $Ca^{2+}$  transients in the absence of extracellular  $Ca^{2+}$  (GCaMP5g). Left: Rs calculated between pre-event baseline  $G_B/T$  and transient peak  $G_P/T$  are shown (blue;  $R = +0.153 \pm 0.0908$ ;  $p = 0.13$ ; one-population Student's t test). Right: Rs for pre-event  $G_B/T$  and transient amplitude  $G_P/T - G_B/T$  after correction are shown (red;  $R = -0.516 \pm 0.0971$ ;  $***p = 7.1 \times 10^{-4}$ ; one-population Student's t test). For correction, see Figure S5. Data points represent Rs from individual cells ( $n = 9$  recordings from slices obtained from three animals).

(H) Recordings of spontaneous  $Ca^{2+}$  transients (GCaMP5g) in the presence of the IP3 receptor inhibitor 2-APB (100  $\mu M$ ) and ryanodine (10  $\mu M$ ) from acute slices. Left: Rs calculated between pre-event baseline  $G_B/T$  and transient peak  $G_P/T$  are shown (blue;  $R = +0.386 \pm 0.0897$ ;  $**p = 0.0012$ ; one-population Student's t test). Right: Rs of pre-event  $G_B/T$  and transient amplitude  $G_P/T - G_B/T$  after correction are shown (red;  $R = -0.211 \pm 0.121$ ;  $p = 0.11$ ; one-population Student's t test). For correction, see Figure S5. Data points represent Rs from individual cells ( $n = 12$  recordings from slices obtained from three animals).

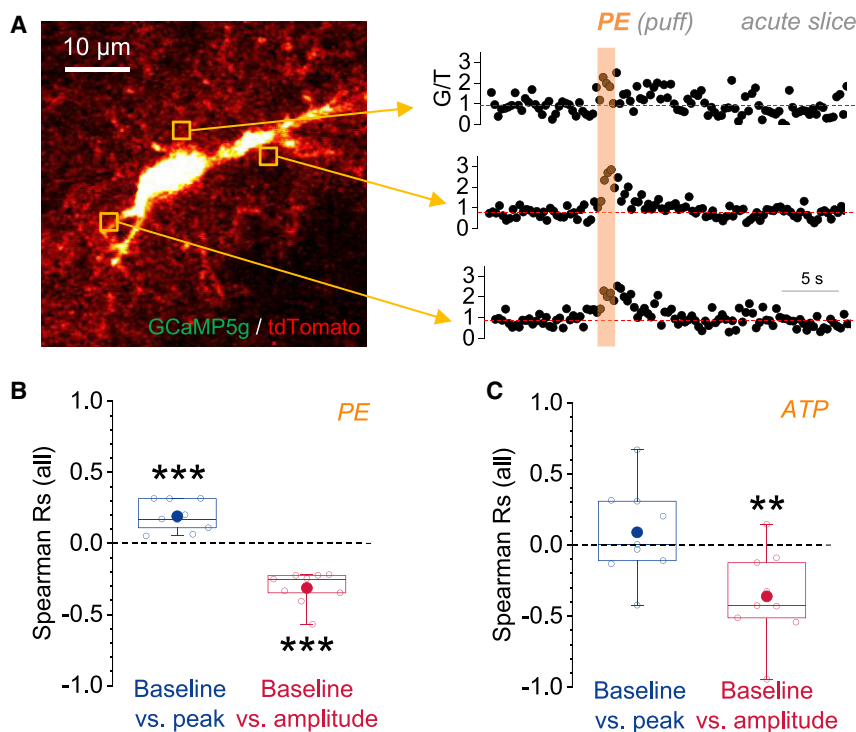

**Figure 4. Properties of Astroglial  $\text{Ca}^{2+}$  Transients Induced by Adrenergic and Purinergic Signaling Are Controlled by the Local Resting  $[\text{Ca}^{2+}]$**

(A) Astroglial  $\text{Ca}^{2+}$  responses were evoked by pressure application of phenylephrine (PE) (250  $\mu\text{M}$ ; 80 ms) through a nearby pipette and monitored in astrocytes expressing both GCaMP5g (G) and tdTomato (T) (left panel). For analysis, the baseline, the peak, and the amplitude of drug-induced transients were quantified after calculation of the background-corrected fluorescence intensity ratio G/T (right panel; three pseudo-randomly chosen transients).

(B) For PE-induced  $\text{Ca}^{2+}$  responses, the Rs were calculated between pre-event baseline  $G_B/T$  and transient peak  $G_P/T$  (blue; left;  $R = +0.190 \pm 0.0354$ ;  $***p = 6.6 \times 10^{-4}$ ; one-population Student's t test) and pre-event  $G_B/T$  and transient amplitude  $G_P/T - G_B/T$  after correction (red; right;  $R = -0.314 \pm 0.0388$ ;  $***p = 4.0 \times 10^{-5}$ ; one-population Student's t test). For correction, see Figure S5. Data points represent Rs from individual cells ( $n = 10$  from different slices).

(C) For ATP-induced  $\text{Ca}^{2+}$  responses (5 mM;  $3 \times 80$  ms at 4 Hz), the Rs were determined between pre-event baseline  $G_B/T$  and transient peak  $G_P/T$  (blue; left;  $R = +0.0895 \pm 0.107$ ;  $p = 0.43$ ; one-population Student's t test) and pre-event  $G_B/T$  and transient amplitude  $G_P/T - G_B/T$  after correction (red; right;  $R = -0.361 \pm 0.105$ ;  $**p = 0.0088$ ; one-population Student's t test). For correction, see Figure S5. Data points represent Rs from individual cells ( $n = 9$  from different slices).

different experimental techniques, in cortex and hippocampus, *in situ* and *in vivo*.

We next investigated in acute slices whether and how  $\text{Ca}^{2+}$  entry from extracellular space and store-dependent  $\text{Ca}^{2+}$  signaling differentially affect the dependence of  $\text{Ca}^{2+}$  transients on resting  $\text{Ca}^{2+}$ . In the absence of extracellular  $\text{Ca}^{2+}$ , spontaneous  $\text{Ca}^{2+}$  transients are store dependent. The amplitudes of these transients displayed a strong negative correlation with the resting  $\text{Ca}^{2+}$  (Figure 3G, right panel), whereas the previously positive correlation with the peak was weaker and did not reach statistical significance (Figure 3G, left panel;  $p = 0.13$ ). The opposite was found when we isolated store-independent  $\text{Ca}^{2+}$  transients by recording  $\text{Ca}^{2+}$  transients in the presence of the IP<sub>3</sub> receptor inhibitor 2-APB and ryanodine (Figure 3H). Thus, store-dependent  $\text{Ca}^{2+}$  entry is largely responsible for the negative correlation between  $\text{Ca}^{2+}$  transient amplitudes and the resting  $\text{Ca}^{2+}$ , which could arise from changes of the driving force for  $\text{Ca}^{2+}$  from  $\text{Ca}^{2+}$  stores or equilibration of  $\text{Ca}^{2+}$  between stores and cytosol (see above and Figures S3 and S4). In contrast, the amplitudes of transients mainly due to  $\text{Ca}^{2+}$  entry from extracellular space are not strongly controlled by resting  $\text{Ca}^{2+}$ .

Does this fundamental relationship hold for other types of receptor-driven and store-dependent astroglial  $\text{Ca}^{2+}$  signaling? Activation of  $\alpha_1$  adrenoceptors induces robust and large-scale  $\text{Ca}^{2+}$  responses in hippocampal and cortical astrocytes (Ding et al., 2013; Duffy and MacVicar, 1995). Because the  $\alpha_1$ -mediated  $\text{Ca}^{2+}$  responses in the hippocampus were previously shown to be store dependent (Duffy and MacVicar, 1995), we expected a

negative correlation between the resting  $\text{Ca}^{2+}$  and their amplitude. This prediction was tested by pressure application of phenylephrine (PE) via a nearby pipette onto GCaMP5g/tdTomato-expressing astrocytes in acute slices (Figure 4A), which reliably evoked widespread  $\text{Ca}^{2+}$  responses in astrocytes. We analyzed  $\text{Ca}^{2+}$  transients in pseudo-randomly chosen ROIs and found, as predicted, that the resting  $\text{Ca}^{2+}$  was overall negatively correlated with the amplitude of  $\text{Ca}^{2+}$  transients and positively with their peak (Figure 4B). Purinergic receptor signaling is another potent trigger of  $\text{Ca}^{2+}$  signals in hippocampal astrocytes (Bowser and Khakh, 2004; Fields and Burnstock, 2006; Porter and McCarthy, 1995). We therefore tested whether ATP-induced  $\text{Ca}^{2+}$  transients are also controlled by the resting  $\text{Ca}^{2+}$ . Pressure injection of ATP reliably evoked large-scale astrocyte  $\text{Ca}^{2+}$  transients, whose amplitude was negatively correlated with resting  $\text{Ca}^{2+}$ , whereas no statistically significant correlation was found between the peak of  $\text{Ca}^{2+}$  transients and the resting  $\text{Ca}^{2+}$  (Figure 4C). Overall, correlations for ATP-induced transients were more variable compared to those with PE and DHPG. Potential explanations are that astrocytes can express a variety of ionotropic and metabotropic purine receptors with varying affinity for purines (Fields and Burnstock, 2006) and that applied ATP may be quickly degraded, thus leading to the uncontrolled recruitment of several pathways of  $\text{Ca}^{2+}$  entry into the astrocytic cytosol. Regardless of that variability, we found a strong negative correlation between the resting  $\text{Ca}^{2+}$  and the  $\text{Ca}^{2+}$  transient amplitude.

In summary, the local resting  $\text{Ca}^{2+}$  of astrocytes controls amplitude and peak of their  $\text{Ca}^{2+}$  transients irrespective of



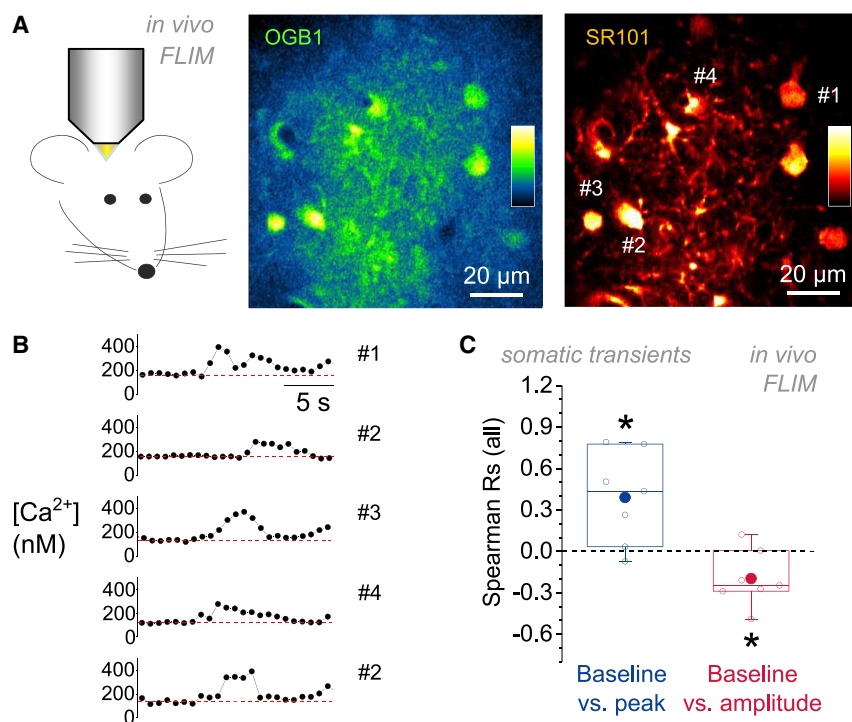

**Figure 5. In Vivo Fluorescence Lifetime Imaging Confirms a Role of Resting  $[Ca^{2+}]$  for Setting Properties of Astroglial  $Ca^{2+}$  Transients**

(A) *In vivo* FLIM  $Ca^{2+}$  recordings using OGB1 (middle panel) in SR101-labeled astrocyte somata (right panel). Examples show fluorescence intensities. Insets represent color code from minimum (bottom) to maximum (top) fluorescence intensity. Labeled cells correspond to sample traces shown in (E).

(B) Sample events detected in the cells nos. 1, 2, 3, and 4 in (A) (two events from no. 2). Events did not occur simultaneously, aligned in time for illustration. Dashed red lines indicate baseline  $[Ca^{2+}]$ .

(C) Recordings of spontaneous somatic transients from seven separate experiments were obtained and analyzed. For each experiment, R was calculated between the pre-event resting  $[Ca^{2+}]$  and the transient peak  $[Ca^{2+}]$  and between the baseline  $[Ca^{2+}]$  and the transient amplitude as before. Left: Rs between baseline  $[Ca^{2+}]$  and peak were positive (blue;  $R = 0.391 \pm 0.127$ ;  $*p = 0.022$ ). Right: Rs between  $Ca^{2+}$  transient baseline and amplitude are shown (red;  $R = -0.197 \pm 0.0764$ ;  $*p = 0.042$ ). Data points represent Rs from individual recordings.

whether they occur spontaneously or whether they are driven by glutamatergic, adrenergic, and purinergic receptor activation. Store-dependent and independent  $Ca^{2+}$  signaling contribute differentially to this relationship.

### Both Spontaneous and Locomotion-Driven Astroglial $Ca^{2+}$ Transients *In Vivo* Are Controlled by the Resting $Ca^{2+}$

To further corroborate our findings *in vivo*, we next undertook *in vivo* FLIM  $Ca^{2+}$  imaging experiments in anesthetized rats in which astrocytes in the same brain region were bulk loaded with OGB1 and counter-stained with SR101 for identification (Zheng et al., 2015). We restricted the analysis to the somatic region of astrocytes to avoid recording from OGB1-labeled neuronal or other structures in the densely packed neuropil (Figures 5A and 5B). Within a typical recording time of 300 s, we rarely observed more than two to four somatic transients in single astrocytes. This precludes the use of the R on single-cell data. We therefore pooled  $[Ca^{2+}]$  transients from all cells in a recording session before analysis so that each dataset was recorded under the same experimental conditions and with the same neuronal network activity. Astroglial resting  $[Ca^{2+}]$  was again positively correlated with the peak  $[Ca^{2+}]$  of spontaneous transients and negatively with their amplitudes (Figure 5C).

Because the *in vivo* experiments above were done in anesthetized animals, and because anesthesia can alter astroglial  $Ca^{2+}$  signaling (Thrane et al., 2012), we performed further experiments in awake mice, in which some cortical astrocytes in the primary somatosensory cortex expressed GCaMP5g and tdTomato. It was previously discovered that astrocytes display locomotion-associated  $Ca^{2+}$  transients in awake mice (Dombeck

et al., 2007). To establish whether these  $Ca^{2+}$  transients related to physiological activity are controlled by the local astroglial resting  $Ca^{2+}$ , we allowed awake mice to run on a treadmill during two-photon fluorescence imaging (Figures 6A–6C). These locomotion-associated  $Ca^{2+}$  transients accounted for  $\sim 90\%$  of all detected  $Ca^{2+}$  transients and frequently spread throughout individual astrocytes. To correlate their amplitudes and peaks with the resting  $Ca^{2+}$ , we again pseudo-randomly chose ROIs for analysis. On the subcellular level, all three parameters displayed considerable variability (CV of amplitudes  $0.43 \pm 0.03$ , of baselines  $0.43 \pm 0.02$ , and of peaks  $0.35 \pm 0.03$ ;  $n = 10$ ). Again, the resting  $Ca^{2+}$  level correlated negatively with the amplitude and positively with the peak of  $Ca^{2+}$  transients (Figures 6D and 6E).

Thus, our observations in live animals confirm that the local resting  $[Ca^{2+}]$  is a key regulator of astroglial  $Ca^{2+}$  signals. Our results demonstrate that higher resting  $[Ca^{2+}]$  levels increase the peaks while lowering the amplitudes of  $Ca^{2+}$  transients and vice versa.

## DISCUSSION

In this study, we set out to establish how the variability of the local resting  $[Ca^{2+}]$  in astroglia determines the properties of  $Ca^{2+}$  signals. Using FLIM of OGB2 loaded via the patch pipette into individual astrocytes, we observed resting  $[Ca^{2+}]$  concentrations of  $62.7 \pm 33.4$  nM (mean  $\pm$  SD), which is in line with previous studies (Kuchibhotla et al., 2009; Parpura and Haydon, 2000; Zheng et al., 2015). Within individual cells, the resting  $[Ca^{2+}]$  varied considerably between sub-compartments (average CV  $\sim 0.4$ ).

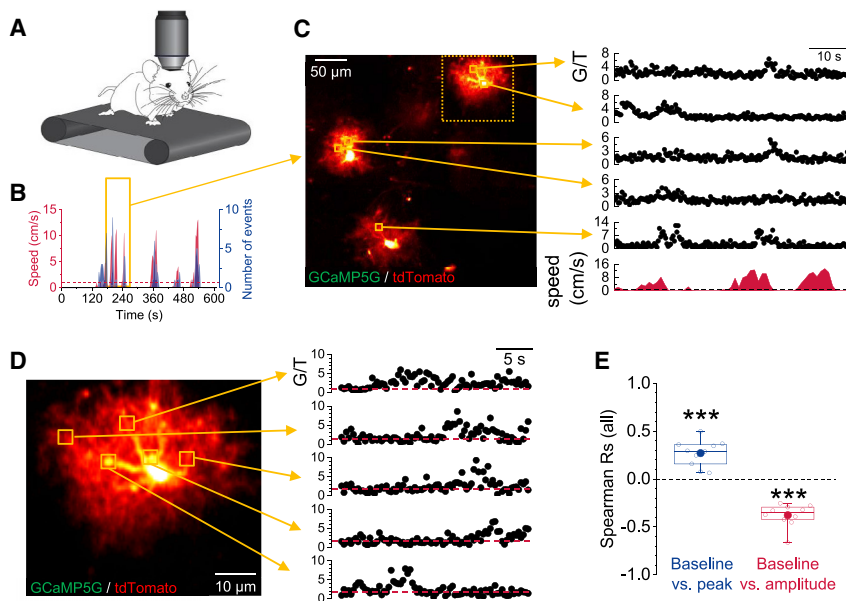

**Figure 6. Locomotion-Associated Astroglial Ca<sup>2+</sup> Transients Are Shaped by the Local Resting [Ca<sup>2+</sup>]**

(A) Schematic of recording astroglial GfAP5G (G) and tdTomato (T) fluorescence from the somatosensory cortex in awake mice.

(B) Example of the correlation between movement speed (red) and the frequency of astrocyte Ca<sup>2+</sup> transients (blue; time bins of 3 s). Orange box indicates time window corresponding to examples of Ca<sup>2+</sup> transients shown in (C). Dashed red line indicates speed threshold of 1 cm/s for analysis.

(C) Sample view field (left panel). Ca<sup>2+</sup> transients (G/T) from five sample ROIs (right panel) corresponding movement speed (bottom right panel). Note the appearance of Ca<sup>2+</sup> transients time locked to movement. Ca<sup>2+</sup> transients were considered to be locomotion associated if their peak occurred within a 6-s time window around a movement with a speed higher than 1 cm/s (~90% of all detected transients). Dashed orange box indicates single cell example shown in (D).

(D) Single-cell example traces as in (C). Shown events did not occur simultaneously, roughly aligned in time for illustration purposes. See Figure S6 for another example.

(E) For locomotion-associated Ca<sup>2+</sup> responses, Rs for each recording were determined between pre-event baseline G<sub>B</sub>/T and transient peak G<sub>P</sub>/T (blue; left; R = +0.270 ± 0.0435; \*\*\*p = 1.6 × 10<sup>-4</sup>; one-population Student's t test) and pre-event G<sub>B</sub>/T and transient amplitude G<sub>P</sub>/T – G<sub>B</sub>/T after correction (red; right; R = –0.378 ± 0.0376; \*\*\*p = 3.4 × 10<sup>-6</sup>; one-population Student's t test). For correction, see Figure S5. Data points represent Rs from individual recordings (n = 10 recordings from four different animals).

We then asked whether the magnitude of evoked Ca<sup>2+</sup> transients depends on the local resting [Ca<sup>2+</sup>] using FLIM of OGB2-loaded astroglia. Here, we used activation of metabotropic glutamate receptors (DHPG), a robust method to induce astroglial Ca<sup>2+</sup> signaling in the hippocampus at various stages of development (Porter and McCarthy, 1996; Sherwood et al., 2017; Tang et al., 2015). The peak [Ca<sup>2+</sup>] of evoked Ca<sup>2+</sup> signals was positively correlated with the basal [Ca<sup>2+</sup>] before the response. In contrast, the amplitude of the response, i.e., the difference between the peak and the baseline, displayed a negative correlation with resting [Ca<sup>2+</sup>]. Importantly, bidirectional manipulations of the resting [Ca<sup>2+</sup>], by UV uncaging of either Ca<sup>2+</sup> or Ca<sup>2+</sup> buffers inside astroglia, affected peak and amplitude of Ca<sup>2+</sup> signals in a fashion predicted by the DHPG experiments. This confirmed a causal role of the local resting [Ca<sup>2+</sup>] in setting peaks and amplitudes of Ca<sup>2+</sup> signals. These findings were further substantiated by recordings of spontaneous Ca<sup>2+</sup> transients in acute slices and *in vivo*. In addition, we found that purinergic and adrenergic Ca<sup>2+</sup> transients in acute slices and locomotion-associated Ca<sup>2+</sup> transients in awake mice were governed by the same principle. Thus, over a wide range of experimental protocols and preparations, the local resting [Ca<sup>2+</sup>] determines the properties of astroglial Ca<sup>2+</sup> signals: a higher resting [Ca<sup>2+</sup>] leads to Ca<sup>2+</sup> signals with a higher peak [Ca<sup>2+</sup>] but with lower amplitude and vice versa.

What could be the molecular mechanisms underlying this relationship? Our experiments demonstrate that the amplitude decrease at higher resting [Ca<sup>2+</sup>] is particularly prominent for store-dependent signaling. We observed for instance that, when Ca<sup>2+</sup> transients were recorded in the presence of the IP3R inhibitor 2-APB and ryanodine, this inverse relationship

was less pronounced and not statistically significant, whereas it was fully preserved when store-dependent signaling was isolated. Furthermore, we found this relationship for glutamatergic, purinergic, and adrenergic Ca<sup>2+</sup> transients, which all have previously been attributed to store-dependent signaling (Duffy and MacVicar, 1995; Porter and McCarthy, 1995, 1996). IP3Rs play a major role in astroglial store-dependent Ca<sup>2+</sup> signaling across brain regions *in vitro* and *in vivo*, in addition to other mechanisms, although the magnitude of their contribution varies between studies (Agarwal et al., 2017; Bazargani and Attwell, 2016; Di Castro et al., 2011; Kanemaru et al., 2014; Sherwood et al., 2017; Srinivasan et al., 2015; Tang et al., 2015; Volterra et al., 2014). One important feature of IP3Rs in the context of the present study is the dependence of their open probability on cytosolic [Ca<sup>2+</sup>] (Bezprozvanny et al., 1991; Foskett et al., 2007). The observed astroglial resting [Ca<sup>2+</sup>] was on average at 62.7 ± 33.4 nM (mean ± SD), although the peak of Ca<sup>2+</sup> signals was at 118 ± 52.2 nM (mean ± SD). Within this concentration range, a rise of the resting [Ca<sup>2+</sup>] will increase the open probability of IP3Rs, irrespective of the IP3 concentration and IP3R subtype (Foskett et al., 2007). Therefore, if Ca<sup>2+</sup> entry from stores into the cytosol is limited by IP3R open probability, an increase of the resting [Ca<sup>2+</sup>] directly facilitates Ca<sup>2+</sup> entry from stores and increases the amplitude of IP3R-driven Ca<sup>2+</sup> transients. However, the opposite was observed.

Alternatively, a decrease of Ca<sup>2+</sup> influx from Ca<sup>2+</sup> stores could also occur at high resting [Ca<sup>2+</sup>] if the latter sufficiently reduced driving forces for Ca<sup>2+</sup> into the cytosol. Straightforward calculations suggest, however, that, for a Ca<sup>2+</sup>-store membrane potential near zero (Lam and Galione, 2013), the store [Ca<sup>2+</sup>] would have to be ~200–400 nM (Figure S3D), which is orders of

magnitude below experimental estimates of 100–800  $\mu\text{M}$  (Burdakov et al., 2005; Lam and Galione, 2013). For another estimate of the store membrane potential of  $\sim -85$  mV (store negative) (Burdakov et al., 2005), a store  $[\text{Ca}^{2+}]$  of 200–400  $\mu\text{M}$  would reproduce experimental observations (Figure S3F). However, this remains speculative in the absence of direct measurements of the  $\text{Ca}^{2+}$  store membrane potentials and given the large disparity of theoretical predictions. In addition, equilibration of  $\text{Ca}^{2+}$  between  $\text{Ca}^{2+}$  stores and the cytosol at the peak of  $\text{Ca}^{2+}$  transients could account for lower amplitudes at high resting  $\text{Ca}^{2+}$  (Figure S4). Interestingly, it was indeed observed recently that rapid and strong reductions of  $\text{Ca}^{2+}$  levels in the astrocyte endoplasmic reticulum can occur spontaneously and can also be triggered by norepinephrine (Okubo et al., 2019). Altogether, this indicates that the decrease of  $\text{Ca}^{2+}$  transient amplitudes with increasing resting  $\text{Ca}^{2+}$  is mechanistically firmly tied to store-dependent  $\text{Ca}^{2+}$  signaling. This does not, however, exclude a contribution by other processes.  $\text{Ca}^{2+}$  removal mechanisms could play a role too. An increased recruitment of  $\text{Ca}^{2+}$  extrusion at higher  $\text{Ca}^{2+}$  levels could curtail transients more strongly so that signal amplitudes decrease at higher resting  $[\text{Ca}^{2+}]$ .

Throughout most of our study, the peak  $[\text{Ca}^{2+}]$  of transients increased with the resting  $[\text{Ca}^{2+}]$ , whereas the amplitude decreased. The previously observed developmental decrease of the astroglial resting  $[\text{Ca}^{2+}]$  (Zheng et al., 2015) could therefore have the opposite effect on astroglial  $\text{Ca}^{2+}$  signals. However, the signaling pathways driving astroglial  $\text{Ca}^{2+}$  signals also change during postnatal development (Otsu et al., 2015; Sun et al., 2013), which could mask the effect of age-dependent resting  $\text{Ca}^{2+}$  on  $\text{Ca}^{2+}$  transients. Beyond developmental changes, physiological and pathophysiological increases and decreases of the resting  $[\text{Ca}^{2+}]$  and the heterogeneity of resting  $[\text{Ca}^{2+}]$  within and between astrocytes (Agarwal et al., 2017; Jackson and Robinson, 2015; Jennings et al., 2017; Kuchibhotla et al., 2009; Mehina et al., 2017; Shigetomi et al., 2011; Zheng et al., 2015) could be directly translated into corresponding increases and decreases of the peak  $[\text{Ca}^{2+}]$  and changes of the  $[\text{Ca}^{2+}]$  transient amplitude. As a consequence, any cellular process that is driven by astroglial  $\text{Ca}^{2+}$  increases could be directly controlled by the local resting  $\text{Ca}^{2+}$  (for review of  $\text{Ca}^{2+}$ -dependent mechanisms, see Araque et al., 2014, Bazargani and Attwell, 2016, Khakh, 2019, Rusakov et al., 2014, and Verkhratsky and Nedergaard 2018). It is an intriguing possibility that astrocytes use their basal  $\text{Ca}^{2+}$  levels as a “memory trace” of local physiological events. The relationship between basal  $\text{Ca}^{2+}$  and transient  $\text{Ca}^{2+}$  signals that we have found could enable astrocytes to convert these cell “memories” into changes of  $\text{Ca}^{2+}$ -dependent cellular activity.

The specific functional consequences will depend on the downstream  $\text{Ca}^{2+}$ -dependent mechanism. For instance, vascular tone and blood flow are controlled by astroglial  $\text{Ca}^{2+}$  and depend on the magnitude of astroglial  $\text{Ca}^{2+}$  transients (Lind et al., 2013; Mehina et al., 2017; Mulligan and MacVicar, 2004; Petzold and Murthy, 2011). It is, however, currently not possible to predict how changes of astroglial resting  $[\text{Ca}^{2+}]$  and the resulting shifts of the signal peak  $[\text{Ca}^{2+}]$  affect blood flow and blood vessel diameter, because the quantitative relationship

between astroglial  $[\text{Ca}^{2+}]$  and, for instance, blood vessel diameter remains to be firmly determined.

Transmitter release from astrocytes is another interesting  $\text{Ca}^{2+}$ -dependent mechanism. Neuronal neurotransmitter release follows a power law dependence on  $[\text{Ca}^{2+}]$  at many synapses, for example, with an exponent of  $\sim 4$  at the Calyx of Held (Schneeggenburger and Neher, 2000). A moderate change of the peak  $[\text{Ca}^{2+}]$  therefore results in a relatively larger change of release. In astroglia, the quantitative relationship between  $[\text{Ca}^{2+}]$  and exocytosis has been less intensely studied. In microisland cultures,  $\text{Ca}^{2+}$  uncaging in astroglia evoked a neuronal current response via glutamate receptors that displayed a dependency on  $[\text{Ca}^{2+}]$  with a Hill coefficient of  $\sim 2$  to 3 (Parpura and Haydon, 2000). In addition, the relationship between the rate of membrane capacitance increase after  $\text{Ca}^{2+}$  uncaging and  $[\text{Ca}^{2+}]$  was approximated by a Hill-type equation with a Hill coefficient of  $\sim 5$  in cultured astrocytes (Kreft et al., 2004). Both findings indicate that a moderate increase of astroglial resting  $[\text{Ca}^{2+}]$  and thus the peak  $[\text{Ca}^{2+}]$  of a  $\text{Ca}^{2+}$  transient could lead to a considerable boost of astroglial transmitter release. However, the relationship between astroglial  $[\text{Ca}^{2+}]$  and astroglial release of a specific transmitter in organized tissue, such as acute slices, or *in vivo* remains to be quantified.

## STAR★METHODS

Detailed methods are provided in the online version of this paper and include the following:

- KEY RESOURCES TABLE
- LEAD CONTACT AND MATERIALS AVAILABILITY
- EXPERIMENTAL MODEL AND SUBJECT DETAILS
- METHOD DETAILS
  - Hippocampal slice preparation
  - Fluorescence lifetime imaging (FLIM) in acute slices
  - Astroglial  $\text{Ca}^{2+}$  and  $\text{Ca}^{2+}$  buffer uncaging
  - *In situ* imaging using GCaMP5g
  - *In vivo* fluorescence lifetime imaging
  - *In vivo* imaging using GCaMP5g in anesthetized mice
  - *In vivo* imaging using GCaMP5g during locomotion
- QUANTIFICATION AND STATISTICAL ANALYSIS
- DATA AND CODE AVAILABILITY

## SUPPLEMENTAL INFORMATION

Supplemental Information can be found online at <https://doi.org/10.1016/j.celrep.2020.02.043>.

## ACKNOWLEDGMENTS

This work was supported by the NRW-Rückkehrprogramm (C.H.), Human Frontiers Science Program (C.H.; HFSP RGY-0084/2012), UCL Excellence Fellowship (C.H.), and German Research Foundation (DFG) (C.H.; SFB1089 B03, SPP1757 HE6949/1, and HE6949/3, FOR2795); Wellcome Trust Principal Fellowship (101896/Z/13/Z; D.A.R.) and ERC Advanced Grant (323113-NETSIGNAL; D.A.R.); and DFG (A.Z.; ZE994/2). Work in the lab of G.C.P. was supported by grants from the European Union Joint Programme—Neurodegenerative Disease Research (JPND) (643417/DACAPO-AD) and the Alzheimer’s Research Initiative (AFI). We thank Theresa Schulte, Jan Peter, and Gerald Seifert for genotyping.

## AUTHOR CONTRIBUTIONS

C.H. and D.A.R. conceptualized and narrated the study. C.M.K., K.B., D.M., A.Z., and C.H. performed and analyzed *in situ* experiments. A.D., K.Z., K.B., C.M.K., C.H., C.R., and G.C.P. performed and analyzed *in vivo* experiments. C.H. wrote the initial manuscript, to which then all authors contributed.

## DECLARATION OF INTERESTS

The authors declare no competing interests.

Received: September 6, 2018

Revised: December 21, 2019

Accepted: February 6, 2020

Published: March 10, 2020

## REFERENCES

- Adams, S.R., Kao, J.P.Y., and Tsien, R.Y. (1989). Biologically useful chelators that take up calcium(2+) upon illumination. *J. Am. Chem. Soc.* *111*, 7957–7968.
- Agarwal, A., Wu, P.-H., Hughes, E.G., Fukaya, M., Tischfield, M.A., Langseth, A.J., Wirtz, D., and Bergles, D.E. (2017). Transient opening of the mitochondrial permeability transition pore induces microdomain calcium transients in astrocyte processes. *Neuron* *93*, 587–605.e7.
- Agronskaia, A.V., Tertoolen, L., and Gerritsen, H.C. (2004). Fast fluorescence lifetime imaging of calcium in living cells. *J. Biomed. Opt.* *9*, 1230–1237.
- Akerboom, J., Chen, T.-W., Wardill, T.J., Tian, L., Marvin, J.S., Mutlu, S., Calderón, N.C., Esposti, F., Borghuis, B.G., Sun, X.R., et al. (2012). Optimization of a GCaMP calcium indicator for neural activity imaging. *J. Neurosci.* *32*, 13819–13840.
- Araque, A., Carmignoto, G., Haydon, P.G., Oliet, S.H.R., Robitaille, R., and Volterra, A. (2014). Gliotransmitters travel in time and space. *Neuron* *81*, 728–739.
- Bazargani, N., and Attwell, D. (2016). Astrocyte calcium signaling: the third wave. *Nat. Neurosci.* *19*, 182–189.
- Bezprozvanny, I., Watras, J., and Ehrlich, B.E. (1991). Bell-shaped calcium-response curves of Ins(1,4,5)P<sub>3</sub>- and calcium-gated channels from endoplasmic reticulum of cerebellum. *Nature* *351*, 751–754.
- Bindocci, E., Savtchouk, I., Liaudet, N., Becker, D., Carriero, G., and Volterra, A. (2017). Three-dimensional Ca<sup>2+</sup> imaging advances understanding of astrocyte biology. *Science* *356*, eaai8185.
- Bowser, D.N., and Khakh, B.S. (2004). ATP excites interneurons and astrocytes to increase synaptic inhibition in neuronal networks. *J. Neurosci.* *24*, 8606–8620.
- Burdakov, D., Petersen, O.H., and Verkhratsky, A. (2005). Intraluminal calcium as a primary regulator of endoplasmic reticulum function. *Cell Calcium* *38*, 303–310.
- De Young, G.W., and Keizer, J. (1992). A single-pool inositol 1,4,5-trisphosphate-receptor-based model for agonist-stimulated oscillations in Ca<sup>2+</sup> concentration. *Proc. Natl. Acad. Sci. USA* *89*, 9895–9899.
- Delekate, A., Fächtemeier, M., Schumacher, T., Ulbrich, C., Foddis, M., and Petzold, G.C. (2014). Metabotropic P2Y<sub>1</sub> receptor signalling mediates astrocytic hyperactivity *in vivo* in an Alzheimer's disease mouse model. *Nat. Commun.* *5*, 5422.
- Di Castro, M.A., Chuquet, J., Liaudet, N., Bhaukaurally, K., Santello, M., Bouvier, D., Tiret, P., and Volterra, A. (2011). Local Ca<sup>2+</sup> detection and modulation of synaptic release by astrocytes. *Nat. Neurosci.* *14*, 1276–1284.
- Ding, F., O'Donnell, J., Thrane, A.S., Zeppenfeld, D., Kang, H., Xie, L., Wang, F., and Nedergaard, M. (2013).  $\alpha$ 1-Adrenergic receptors mediate coordinated Ca<sup>2+</sup> signaling of cortical astrocytes in awake, behaving mice. *Cell Calcium* *54*, 387–394.
- Dombeck, D.A., Khabbaz, A.N., Collman, F., Adelman, T.L., and Tank, D.W. (2007). Imaging large-scale neural activity with cellular resolution in awake, mobile mice. *Neuron* *56*, 43–57.
- Duffy, S., and MacVicar, B.A. (1995). Adrenergic calcium signaling in astrocyte networks within the hippocampal slice. *J. Neurosci.* *15*, 5535–5550.
- Fellin, T., Pascual, O., Gobbo, S., Pozzan, T., Haydon, P.G., and Carmignoto, G. (2004). Neuronal synchrony mediated by astrocytic glutamate through activation of extrasynaptic NMDA receptors. *Neuron* *43*, 729–743.
- Fields, R.D., and Burnstock, G. (2006). Purinergic signalling in neuron-glia interactions. *Nat. Rev. Neurosci.* *7*, 423–436.
- Foskett, J.K., White, C., Cheung, K.-H., and Mak, D.-O.D. (2007). Inositol trisphosphate receptor Ca<sup>2+</sup> release channels. *Physiol. Rev.* *87*, 593–658.
- Gee, J.M., Smith, N.A., Fernandez, F.R., Economo, M.N., Brunet, D., Rothermel, M., Morris, S.C., Talbot, A., Palumbos, S., Ichida, J.M., et al. (2014). Imaging activity in neurons and glia with a Polr2a-based and cre-dependent GCaMP5G-IRES-tdTomato reporter mouse. *Neuron* *83*, 1058–1072.
- Guizar-Sicairos, M., Thurman, S.T., and Fienup, J.R. (2008). Efficient subpixel image registration algorithms. *Opt. Lett.* *33*, 156–158.
- Heller, J.P., and Rusakov, D.A. (2015). Morphological plasticity of astroglia: Understanding synaptic microenvironment. *Glia* *63*, 2133–2151.
- Henneberger, C., and Rusakov, D.A. (2012). Monitoring local synaptic activity with astrocytic patch pipettes. *Nat. Protoc.* *7*, 2171–2179.
- Henneberger, C., Papouin, T., Oliet, S.H.R., and Rusakov, D.A. (2010). Long-term potentiation depends on release of D-serine from astrocytes. *Nature* *463*, 232–236.
- Hirase, H., Qian, L., Barthó, P., and Buzsáki, G. (2004). Calcium dynamics of cortical astrocytic networks *in vivo*. *PLoS Biol.* *2*, E96.
- Höfer, T., Venance, L., and Giaume, C. (2002). Control and plasticity of intercellular calcium waves in astrocytes: a modeling approach. *J. Neurosci.* *22*, 4850–4859.
- Jackson, J.G., and Robinson, M.B. (2015). Reciprocal regulation of mitochondrial dynamics and calcium signaling in astrocyte processes. *J. Neurosci.* *35*, 15199–15213.
- Jennings, A., Tyurikova, O., Bard, L., Zheng, K., Semyanov, A., Henneberger, C., and Rusakov, D.A. (2017). Dopamine elevates and lowers astroglial Ca<sup>2+</sup> through distinct pathways depending on local synaptic circuitry. *Glia* *65*, 447–459.
- Kanemaru, K., Sekiya, H., Xu, M., Satoh, K., Kitajima, N., Yoshida, K., Okubo, Y., Sasaki, T., Moritoh, S., Hasuwa, H., et al. (2014). *In vivo* visualization of subtle, transient, and local activity of astrocytes using an ultrasensitive Ca(2+) indicator. *Cell Rep.* *8*, 311–318.
- Khakh, B.S. (2019). Astrocyte-neuron interactions in the striatum: insights on identity, form, and function. *Trends Neurosci.* *42*, 617–630.
- Klingauf, J., and Neher, E. (1997). Modeling buffered Ca<sup>2+</sup> diffusion near the membrane: implications for secretion in neuroendocrine cells. *Biophys. J.* *72*, 674–690.
- Kreft, M., Stenovec, M., Rupnik, M., Grilc, S., Kržan, M., Potokar, M., Pangršič, T., Haydon, P.G., and Zorec, R. (2004). Properties of Ca(2+)-dependent exocytosis in cultured astrocytes. *Glia* *46*, 437–445.
- Kuchibhotla, K.V., Lattarulo, C.R., Hyman, B.T., and Bacskai, B.J. (2009). Synchronous hyperactivity and intercellular calcium waves in astrocytes in Alzheimer mice. *Science* *323*, 1211–1215.
- Lam, A.K.M., and Galione, A. (2013). The endoplasmic reticulum and junctional membrane communication during calcium signaling. *Biochim. Biophys. Acta* *1833*, 2542–2559.
- Lind, B.L., Brazhe, A.R., Jessen, S.B., Tan, F.C.C., and Lauritzen, M.J. (2013). Rapid stimulus-evoked astrocyte Ca<sup>2+</sup> elevations and hemodynamic responses in mouse somatosensory cortex *in vivo*. *Proc. Natl. Acad. Sci. USA* *110*, E4678–E4687.
- Medvedev, N., Popov, V., Henneberger, C., Kraev, I., Rusakov, D.A., and Stewart, M.G. (2014). Glia selectively approach synapses on thin dendritic spines. *Philos. Trans. R. Soc. Lond. B Biol. Sci.* *369*, 20140047.
- Mehina, E.M.F., Murphy-Royal, C., and Gordon, G.R. (2017). Steady-state free Ca<sup>2+</sup> in astrocytes is decreased by experience and impacts arteriole tone. *J. Neurosci.* *37*, 8150–8165.

- Minge, D., Senkov, O., Kaushik, R., Herde, M.K., Tikhobrazova, O., Wulff, A.B., Mironov, A., van Kuppevelt, T.H., Oosterhof, A., Kochlamazashvili, G., et al. (2017). Heparan sulfates support pyramidal cell excitability, synaptic plasticity, and context discrimination. *Cereb. Cortex* **27**, 903–918.
- Mishra, A., Reynolds, J.P., Chen, Y., Gourine, A.V., Rusakov, D.A., and Attwell, D. (2016). Astrocytes mediate neurovascular signaling to capillary pericytes but not to arterioles. *Nat. Neurosci.* **19**, 1619–1627.
- Mori, T., Tanaka, K., Buffo, A., Wurst, W., Kühn, R., and Götz, M. (2006). Inducible gene deletion in astroglia and radial glia—a valuable tool for functional and lineage analysis. *Glia* **54**, 21–34.
- Mulligan, S.J., and MacVicar, B.A. (2004). Calcium transients in astrocyte endfeet cause cerebrovascular constrictions. *Nature* **431**, 195–199.
- Navarrete, M., and Araque, A. (2008). Endocannabinoids mediate neuron-astrocyte communication. *Neuron* **57**, 883–893.
- Nuriya, M., and Hirase, H. (2016). Involvement of astrocytes in neurovascular communication. In *Brain Research*, K. Masamoto, H. Hirase, and K. Yamada, eds. (Elsevier), pp. 41–62.
- Okubo, Y., Kanemaru, K., Suzuki, J., Kobayashi, K., Hirose, K., and Iino, M. (2019). Inositol 1,4,5-trisphosphate receptor type 2-independent  $\text{Ca}^{2+}$  release from the endoplasmic reticulum in astrocytes. *Glia* **67**, 113–124.
- Otsu, Y., Couchman, K., Lyons, D.G., Collot, M., Agarwal, A., Mallet, J.-M., Pfrieger, F.W., Bergles, D.E., and Charpak, S. (2015). Calcium dynamics in astrocyte processes during neurovascular coupling. *Nat. Neurosci.* **18**, 210–218.
- Parpura, V., and Haydon, P.G. (2000). Physiological astrocytic calcium levels stimulate glutamate release to modulate adjacent neurons. *Proc. Natl. Acad. Sci. USA* **97**, 8629–8634.
- Patrushev, I., Gavrilov, N., Turlapov, V., and Semyanov, A. (2013). Subcellular location of astrocytic calcium stores favors extrasynaptic neuron-astrocyte communication. *Cell Calcium* **54**, 343–349.
- Perea, G., Navarrete, M., and Araque, A. (2009). Tripartite synapses: astrocytes process and control synaptic information. *Trends Neurosci.* **32**, 421–431.
- Petzold, G.C., and Murthy, V.N. (2011). Role of astrocytes in neurovascular coupling. *Neuron* **71**, 782–797.
- Porter, J.T., and McCarthy, K.D. (1995). Adenosine receptors modulate  $[\text{Ca}^{2+}]_i$  in hippocampal astrocytes in situ. *J. Neurochem.* **65**, 1515–1523.
- Porter, J.T., and McCarthy, K.D. (1996). Hippocampal astrocytes in situ respond to glutamate released from synaptic terminals. *J. Neurosci.* **16**, 5073–5081.
- Pryazhnikov, E., and Khiroug, L. (2008). Sub-micromolar increase in  $[\text{Ca}^{2+}]_i$  triggers delayed exocytosis of ATP in cultured astrocytes. *Glia* **56**, 38–49.
- Rusakov, D.A., Bard, L., Stewart, M.G., and Henneberger, C. (2014). Diversity of astroglial functions alludes to subcellular specialisation. *Trends Neurosci.* **37**, 228–242.
- Savtchenko, L.P., Bard, L., Jensen, T.P., Reynolds, J.P., Kraev, I., Medvedev, N., Stewart, M.G., Henneberger, C., and Rusakov, D.A. (2018). Disentangling astroglial physiology with a realistic cell model in silico. *Nat. Commun.* **9**, 3554.
- Schneggenburger, R., and Neher, E. (2000). Intracellular calcium dependence of transmitter release rates at a fast central synapse. *Nature* **406**, 889–893.
- Schneider, C.A., Rasband, W.S., and Eliceiri, K.W. (2012). NIH Image to ImageJ: 25 years of image analysis. *Nat. Methods* **9**, 671–675.
- Scott, R., and Rusakov, D.A. (2006). Main determinants of presynaptic  $\text{Ca}^{2+}$  dynamics at individual mossy fiber-CA3 pyramidal cell synapses. *J. Neurosci.* **26**, 7071–7081.
- Sherwood, M.W., Arizono, M., Hisatsune, C., Bannai, H., Ebisui, E., Sherwood, J.L., Panatier, A., Oliet, S.H.R., and Mikoshiba, K. (2017). Astrocytic  $\text{IP}_3$  Rs: contribution to  $\text{Ca}^{2+}$  signalling and hippocampal LTP. *Glia* **65**, 502–513.
- Shigetomi, E., Kracun, S., Sofroniew, M.V., and Khakh, B.S. (2010). A genetically targeted optical sensor to monitor calcium signals in astrocyte processes. *Nat. Neurosci.* **13**, 759–766.
- Shigetomi, E., Tong, X., Kwan, K.Y., Corey, D.P., and Khakh, B.S. (2011). TRPA1 channels regulate astrocyte resting calcium and inhibitory synapse efficacy through GAT-3. *Nat. Neurosci.* **15**, 70–80.
- Shigetomi, E., Patel, S., and Khakh, B.S. (2016). Probing the complexities of astrocyte calcium signaling. *Trends Cell Biol.* **26**, 300–312.
- Srinivasan, R., Huang, B.S., Venugopal, S., Johnston, A.D., Chai, H., Zeng, H., Golshani, P., and Khakh, B.S. (2015).  $\text{Ca}^{2+}$  signaling in astrocytes from  $\text{Ip}3\text{r}2(-/-)$  mice in brain slices and during startle responses in vivo. *Nat. Neurosci.* **18**, 708–717.
- Sun, W., McConnell, E., Pare, J.-F., Xu, Q., Chen, M., Peng, W., Lovatt, D., Han, X., Smith, Y., and Nedergaard, M. (2013). Glutamate-dependent neuroglial calcium signaling differs between young and adult brain. *Science* **339**, 197–200.
- Tang, W., Szokol, K., Jensen, V., Enger, R., Trivedi, C.A., Hvalby, Ø., Helm, P.J., Looger, L.L., Sprengel, R., and Nagelhus, E.A. (2015). Stimulation-evoked  $\text{Ca}^{2+}$  signals in astrocytic processes at hippocampal CA3-CA1 synapses of adult mice are modulated by glutamate and ATP. *J. Neurosci.* **35**, 3016–3021.
- Thrane, A.S., Rangroo Thrane, V., Zeppenfeld, D., Lou, N., Xu, Q., Nagelhus, E.A., and Nedergaard, M. (2012). General anesthesia selectively disrupts astrocyte calcium signaling in the awake mouse cortex. *Proc. Natl. Acad. Sci. USA* **109**, 18974–18979.
- Verkhatsky, A., and Nedergaard, M. (2018). Physiology of astroglia. *Physiol. Rev.* **98**, 239–389.
- Volterra, A., Liaudet, N., and Savtchouk, I. (2014). Astrocyte  $\text{Ca}^{2+}$  signalling: an unexpected complexity. *Nat. Rev. Neurosci.* **15**, 327–335.
- Vyleta, N.P., and Jonas, P. (2014). Loose coupling between  $\text{Ca}^{2+}$  channels and release sensors at a plastic hippocampal synapse. *Science* **343**, 665–670.
- Wang, Y., Rattner, A., Zhou, Y., Williams, J., Smallwood, P.M., and Nathans, J. (2012). *Norrin/Frizzled4* signaling in retinal vascular development and blood brain barrier plasticity. *Cell* **151**, 1332–1344.
- Wilms, C.D., Schmidt, H., and Eilers, J. (2006). Quantitative two-photon  $\text{Ca}^{2+}$  imaging via fluorescence lifetime analysis. *Cell Calcium* **40**, 73–79.
- Zheng, K., Bard, L., Reynolds, J.P., King, C., Jensen, T.P., Gourine, A.V., and Rusakov, D.A. (2015). Time-resolved imaging reveals heterogeneous landscapes of nanomolar  $\text{Ca}^{2+}$  in neurons and astroglia. *Neuron* **88**, 277–288.

## STAR★METHODS

## KEY RESOURCES TABLE

| REAGENT or RESOURCE                           | SOURCE                            | IDENTIFIER    |
|-----------------------------------------------|-----------------------------------|---------------|
| Chemicals, Peptides, and Recombinant Proteins |                                   |               |
| TTX                                           | Tocris                            | Cat. #1069    |
| DHPG                                          | Tocris                            | Cat. #0342/1  |
| Phenylephrine                                 | Sigma-Aldrich                     | Cat. P6126    |
| Ryanodine                                     | Abcam                             | Cat. AB120083 |
| 2-APB                                         | Abcam                             | Cat. AB120124 |
| Alexa Fluor 594 Hydrazide                     | ThermoFisher                      | A10438        |
| Alexa Fluor 488 Hydrazide                     | ThermoFisher                      | A10436        |
| Oregon Green 488 BAPTA-1 AM (OGB1-AM)         | ThermoFisher                      | Cat. O6807    |
| Oregon Green 488 BAPTA-2 (OGB2)               | ThermoFisher                      | Cat. O6808    |
| Diazo-2                                       | ThermoFisher                      | Cat. D3034    |
| NP-EGTA                                       | ThermoFisher                      | Cat. N6802    |
| Sulforhodamine 101 (SR101)                    | Sigma-Aldrich                     | Cat. S7635    |
| Experimental Models: Organisms/Strains        |                                   |               |
| GLASTcreERT2                                  | <a href="#">Mori et al., 2006</a> | N/A           |
| GLASTcreER                                    | <a href="#">Wang et al., 2012</a> | N/A           |
| GCaMP5g-IRES-tdTomato                         | <a href="#">Gee et al., 2014</a>  | N/A           |
| Sprague Dawley                                | Charles River                     | #400          |
| Software and Algorithms                       |                                   |               |
| Custom FLIM analysis scripts                  | This manuscript                   | N/A           |

## LEAD CONTACT AND MATERIALS AVAILABILITY

Further information and requests for resources and reagents should be directed to and will be fulfilled by the Lead Contact, Christian Henneberger ([christian.henneberger@uni-bonn.de](mailto:christian.henneberger@uni-bonn.de)). This study did not generate new unique reagents.

## EXPERIMENTAL MODEL AND SUBJECT DETAILS

The experiments outlined below were performed using male Sprague Dawley rats and the transgenic mice lines GLASTcreERT2 ([Mori et al., 2006](#)), GLASTcreER ([Wang et al., 2012](#)) and GCaMP5g-IRES-tdTomato ([Gee et al., 2014](#)). For experiments using transgenic mice, animals of both genders were used to minimize breeding and were randomly assigned to experiments. All experiments and surgical procedures were performed under the required licenses and in full compliance with national, local and European Union regulations. Cre expression was induced by tamoxifen injection (100 mg / kg BW; 1/day IP, 5 days) at the age of 3 weeks unless stated otherwise. The specific age of animals varied between individual experiments and is stated along with other method details below.

## METHOD DETAILS

## Hippocampal slice preparation

Acute hippocampal slices from rats and mice were prepared as previously described ([Minge et al., 2017](#)). Briefly, acute hippocampal slices were prepared from three to five-week-old male Sprague Dawley rats and six to eight-week-old GLASTcreERT2 x GCaMP5g mice. Slices with a thickness of 350  $\mu$ m for rats and 300  $\mu$ m for mice were prepared in an ice-cold slicing solution containing (in mM): NaCl 60, sucrose 105, KCl 2.5, MgCl<sub>2</sub> 7, NaH<sub>2</sub>PO<sub>4</sub> 1.25, ascorbic acid 1.3, sodium pyruvate 3, NaHCO<sub>3</sub> 26, CaCl<sub>2</sub> 0.5, and glucose 10 (osmolarity 300-305 mOsm), and kept in the slicing solution at 34°C for 15 minutes before being stored at room temperature (21-23°C) in an extracellular solution containing (in mM) NaCl 126, KCl 2.5, MgSO<sub>4</sub> 1.3, NaH<sub>2</sub>PO<sub>4</sub> 1.25, NaHCO<sub>3</sub> 26, CaCl<sub>2</sub> 2, and glucose 10. All solutions were continuously bubbled with 95% O<sub>2</sub>/ 5% CO<sub>2</sub>. Experiments were performed at ~34°C.

### Fluorescence lifetime imaging (FLIM) in acute slices

For astroglial  $[Ca^{2+}]$  measurement, Oregon Green 488 BAPTA-2 (OGB2, Thermo Fisher Scientific) was loaded into individual astrocytes as previously described (Henneberger and Rusakov, 2012; Henneberger et al., 2010; Zheng et al., 2015). Briefly, acute slices were transferred into a recording chamber on an upright microscope and held under continuous superfusion with extracellular solution (34°C, continuously bubbled with 95%  $O_2$ / 5%  $CO_2$ ). In these experiments, neuronal activity was inhibited by adding the sodium channel blocker TTX (1  $\mu$ M, Tocris Bioscience) to the extracellular solution. Putative astrocytes were identified using DIC optics and patched (Multiclamp 700B) with an intracellular solution containing (in mM)  $KCH_3O_3S$  135, HEPES 10, di-Tris-Phospho-creatine 10,  $MgCl_2$  4,  $Na_2$ -ATP 4, Na-GTP 0.4 (pH adjusted to 7.2 using KOH, osmolarity 290-295 mOsm), OGB2 0.2, and Alexa Fluor 594 0.1 (for visualizing the astrocyte). Cells were held in current clamp or voltage clamp at their resting potential. Astroglial cells were identified by their low resting membrane potential ( $< -80$  mV), low input resistance ( $< 10$  M $\Omega$ ), symmetric, 'passive' responses to current injections ( $-200$ ,  $-100$ ,  $+100$ ,  $+200$  pA) and their characteristic morphology. Recordings were rejected if the access resistance was initially above 20 M $\Omega$  or changed more than 30% during the recording. After dye equilibration for 10-20 minutes,  $Ca^{2+}$  imaging experiments started. After acquisition of a baseline period, the mGluR agonist DHPG was pressure-applied through a patch pipette placed immediately adjacent to the astrocyte territory. DHPG (300  $\mu$ M) was dissolved in extracellular solution also containing Alexa Fluor 647 (3  $\mu$ M) to visualize the ejection of DHPG into the tissue.

Two-photon excitation FLIM was performed as previously described (Minge et al., 2017; Zheng et al., 2015) using time-correlated single photon counting (TCSPC) on Olympus microscopes (FV10MP and FV1000MP) upgraded with TCSPC modules (Picoquant). TCSPC data were collected by frame scanning ( $\sim 200 \times 200$  pixel corresponding to  $\sim 60 \times 60 \mu m^2$ , 2-3 Hz). The OGB2 fluorescence decay was then analyzed using custom written scripts (MATLAB, Mathworks). The OGB2 fluorescence lifetime was characterized by calculating the ratio of the number of detected photons in two time windows (Figure 1A) and by deconvolution fitting. For the latter, a triple-exponential decay function convolved with the instrument response function (IRF, approximation of experimentally determined IRF) was iteratively fitted to the fluorescence decays (example in Figure S1) and the amplitude-weighted average of the individual decay time constants was calculated:  $\tau = (A1 \times \tau1 + A2 \times \tau2 + A3 \times \tau3) / (A1 + A2 + A3)$ .

Calibration of OGB2 lifetimes were performed in a cuvette as previously described (Minge et al., 2017; Zheng et al., 2015) using a calibration solution based on the intracellular whole-cell patch clamp solution, to which 10 mM BAPTA and 0-10 mM  $CaCl_2$  and 0.05  $\mu$ M OGB2 were added. The free  $[Ca^{2+}]$  was estimated using WebMax Chelator (<https://somapp.ucdmc.ucdavis.edu/pharmacology/bers/maxchelator/webmaxc/webmaxcS.htm>) taking into account the concentration of  $Ca^{2+}$ ,  $Ca^{2+}$ -buffers, ATP and  $Mg^{2+}$ . The relationship between  $[Ca^{2+}]$  and the photon count ratio and amplitude-weighted average decay constant could be approximated by a Hill function (Figures 1B and S1A). Comparing the two measurements of OGB2 fluorescence decay we found that the results obtained using the photon count ratio varied less especially when the number of analyzed photons was low (Figure S1B). For this reason, the photon count ratio was used for data analysis of physiological experiments and converted into  $[Ca^{2+}]$ . The OGB2 decay time constants ( $\tau$ 1-3) differed slightly between intracellular measurements and calibrations (Figure S1C). This slight difference was compensated by the following procedure (Figures S1D–S1F). We first estimated the change of the photon count ratio introduced by changes of the decay time constants. This was done by simulating OGB2 fluorescence decays across a set of combinations of component amplitudes (A1-3). For each combination of component amplitudes, the OGB2 fluorescence decay was simulated for intracellular and calibration decay time constants and the photon count ratio was determined for both (Figures S1D and S1E). This relationship was then used to translate photon count ratios obtained from intracellular measurements into calibration photon count ratios and then into  $Ca^{2+}$  concentrations (for experimental confirmation see Figure S1F).

For experimental frame scanning TCSPC data, detected photons were pooled across automatically set regions of interest (ROIs,  $\sim 5 \times 5 \mu m^2$ ) and in time windows of 600 ms (Figures 1D and 2). ROIs were automatically removed from further analysis if the average number of photons per time windows was less than 1500. This effectively removed ROIs outside the investigated cell from analysis. ROIs were removed manually in a second step if they overlapped with either the patch or puff pipette.  $[Ca^{2+}]$  was then calculated for each time ROI and time window. In experiments with DHPG pressure application, the baseline  $[Ca^{2+}]$ , the response peak  $[Ca^{2+}]$  and the difference (amplitude) was automatically calculated.

### Astroglial $Ca^{2+}$ and $Ca^{2+}$ buffer uncaging

In a subset of experiments, FLIM  $[Ca^{2+}]$  measurements were combined with intracellular  $Ca^{2+}/Ca^{2+}$  buffer uncaging. In these experiments, either the UV-photolysable  $Ca^{2+}$ -cage NP-EGTA or the UV-photoactivatable  $Ca^{2+}$  buffer diazo-2 was used (5 mM NP-EGTA tetrapotassium salt and 3 mM  $CaCl_2$  added to the intracellular solution, or 2.5 mM diazo-2 tetrapotassium salt). UV uncaging was performed using a computer-controlled UV-LED (365 nm, Thorlabs) with the output power set to 2.5 mW and activated with 10 pulses of 50 ms delivered at 10 Hz. The UV-stimulus was delivered via a light guide (1 mm, NA 0.39) submerged in the extracellular solution and positioned just above the hippocampal slice in the vicinity of the investigated astrocytes.

### In situ imaging using GCaMP5g

For experiments using the genetically encoded  $Ca^{2+}$  indicator GCaMP5g, flox-stop GCaMP5g-IRES-tdTomato mice (Gee et al., 2014) were cross-bred with GLASTcreERT2 mice (Mori et al., 2006) and injected with tamoxifen as described above to induce recombination in astrocytes. Acute slices were prepared from these animals, as explained above, two weeks after the end of tamoxifen injections around postnatal day 60. For recordings, slices were transferred to the recording chamber of an upright microscope as

in other *in situ* experiments and the fluorescence intensity of GCaMP5g (G) and tdTomato (T) was recorded by time-lapse frame-scanning ( $128 \times 128$  pixels,  $\sim 80 \times 80 \mu\text{m}^2$ ,  $\sim 3$  Hz). Image sequences were analyzed in ImageJ (Schneider et al., 2012) by first subtracting the background fluorescence. Spontaneous transients/events were then visually identified and analyzed by placing a ROI ( $\sim 3 \times 3 \mu\text{m}^2$ ) centered on the peak elevation of GCaMP5g fluorescence intensity. The ROI fluorescence intensities for each indicator and frame were determined and the fluorescence intensity ratio G/T was calculated for each frame. Analogous to FLIM  $\text{Ca}^{2+}$  imaging, the pre-event G/T, the event peak G/T and the difference between these, i.e., the amplitude were computed as averages over three frames. Because the focus was on the relationship between basal  $\text{Ca}^{2+}$  levels and the amplitude/peak of  $\text{Ca}^{2+}$  transients, we did not quantify frequency, spatial extent and propagation of  $\text{Ca}^{2+}$  transients. For experiments using pressure-applied drugs, a patch pipette containing phenylephrine (PE, 250  $\mu\text{M}$ , Sigma-Aldrich) or ATP (5 mM, Sigma-Aldrich), and also Alexa Fluor 647 (3  $\mu\text{M}$ ) for visualization of the pipette and application, was placed in close vicinity of an astrocyte soma (30–40  $\mu\text{m}$ ). Only  $\text{Ca}^{2+}$  transients time-locked to a brief puff (80 ms for PE; 3  $\times$  80 ms at 4 Hz for ATP) were further analyzed.

### **In vivo fluorescence lifetime imaging**

Two-photon excitation FLIM was performed *in vivo* as previously described (Zheng et al., 2015) and in accordance with the European Commission Directive (86/609/EEC) and the United Kingdom Home Office (Scientific Procedures) Act (1986). Briefly, young male rats (100–120 g) were anesthetized with urethane (initial dose 1.3 g/kg, i.p.; then 10–25 mg/kg/hr, i.v.) following isoflurane (5% in air) induction. The skin overlying the skull was removed and a small craniotomy was made above the somatosensory cortex. Cortical astrocytes were labeled with sulforhodamine 101 (SR101) and OGB1. The solution containing OGB-1 AM (1 mM) and SR101 (to aid identification of astroglia, 25 mM) in artificial cerebrospinal fluid (124 mM NaCl, 3 mM KCl, 2 mM  $\text{CaCl}_2$ , 26 mM,  $\text{NaHCO}_3$ , 1.25 mM  $\text{NaH}_2\text{PO}_4$ , 1 mM  $\text{MgSO}_4$ , 10 mM D-glucose saturated with 95%  $\text{O}_2$  / 5%  $\text{CO}_2$  [pH 7.4]) was delivered (volume 1.5 ml) via a glass micropipette to the targeted area of the right primary somatosensory cortex, immediately caudal of the coronal suture. The exposed surface of the cortex was then covered with 1% agarose and protected with a glass coverslip secured to the skull using acrylic dental cement. Two-photon excitation for FLIM acquisition was carried out as described below using a Newport-Spectraphysics Ti:Sapphire Mai-Tai laser, Olympus FV1000 with XLPlan N 25 water immersion multi-photon objective (NA 1.05), and PicoQuant PicoHarp 300 TCSPC (alternatively, using Femtonics Femto-2D-FLIM microscope). Frame dimensions were typically 50–70  $\mu\text{m}$  squares which encompasses 3–10 astrocytes in the same field of view. For analysis, see above and Zheng et al. (2015). Continuous frame scans at 0.5 Hz was used for a total duration of 300 s.

### **In vivo imaging using GCaMP5g in anesthetized mice**

For acute experiments in anesthetized mice, an intensity-based analysis of astroglial  $\text{Ca}^{2+}$  signaling using the genetically-encoded  $\text{Ca}^{2+}$  indicator GCaMP5g was performed. Please see above for the induction of Cre recombination in transgenic mice conditionally expressing GLASTcreER (Wang et al., 2012) and GCaMP5g (Gee et al., 2014). In 11 to 14 week old mice, cranial windows were prepared as previously described (Delekate et al., 2014). Briefly, mice were anesthetized with isoflurane (induction, 3% v/v; maintenance, 1%–1.5% v/v) and kept on a heating plate (37°C). The mouse head was fixed in a stereotaxic frame, the scalp was removed, and a circular cranial window was drilled above the primary somatosensory cortex. Agarose (1.5%) was placed between the cortex and a cover glass, which was fixed and closed the window. Intensity-based recordings and analyses of astroglial  $\text{Ca}^{2+}$  signaling were performed as described for *in situ* GCaMP5g experiments.

### **In vivo imaging using GCaMP5g during locomotion**

For awake *in vivo* imaging, we used mice expressing GCaMP5g and tdTomato in astrocytes as described above. Two weeks after tamoxifen injection (performed in the 10<sup>th</sup> postnatal week), the chronic cranial window surgery was performed. Briefly, analgesics were administered 30 minutes before surgery start, mice were anesthetized with isoflurane (induction, 3% v/v; maintenance 1%–1.5% v/v) and kept on a heating plate. After fixing the animal's head in a stereotaxic frame, the scalp was removed, and the skull was pre-treated with light-curable dental cement. A 4 mm circular window was drilled above the primary somatosensory cortex and pre-sealed with a cover glass using super glue. For proper fixation of the window the light-curable dental cement was applied at the edges between the cover glass and the bone. To allow for the head fixation of the animal during the awake imaging, an aluminum head holder was placed at the contralateral side of the skull and fixed with the light-curable cement. After recovery animals were placed back into their home cage and post-surgical care was administered for three consecutive days.

One week after surgery the animals were habituated to run head-fixed on the linear treadmill (Luigs & Neumann, Germany). On the first day animals could explore the treadmill by running freely on the belt. The animals were then kept at one position on the belt by holding their tail and letting them run on the belt for approximately 30 minutes. One day after this initial exploratory phase, the animals were fixed with the head holder into the holding device on the treadmill and allowed to run freely for 30 minutes. This training was repeated for two more days until the animals were running calmly on the belt. On the last day of habituation, the treadmill was positioned under the objective of the multiphoton microscope (Trim Scopell, LaVision Bio Tec) and the animal was again head-fixed and habituated to the surroundings. The first day of awake *in vivo* imaging took place two weeks after surgery (minimum age of animals was 13 weeks). The animals were head-fixed to the treadmill and allowed to run for a maximum of 60 minutes while being imaged. Consecutive imaging series were taken for 10 minutes each with a 16x objective (Nikon). Image acquisition was performed at  $\sim 3$  Hz, with a pixel dwell time of  $\sim 2 \mu\text{s}$ , a frame size of  $\sim 200 \mu\text{m} \times 200 \mu\text{m}$  and a nominal resolution of 0.5  $\mu\text{m}/\text{pixel}$ . To correct for movement



artifacts, we made use of a custom-written MATLAB (Mathworks) script to register and align imaging data in an elastic group-wise fashion. The script uses a published algorithm (Guizar-Sicairos et al., 2008) with an additional implementation of the Lucas-Kanade algorithm. The field of view contained two to three astrocytes, whose  $\text{Ca}^{2+}$  transients were pooled for the analysis. The movement of the animal was detected by a digital position readout device (Luigs&Neumann, Germany). The velocity of the animal moving on the belt was acquired at 20 Hz starting simultaneously with the start of image acquisition. Output data was then further processed to correlate movement and imaging data. On average the animals moved with a speed of  $65.4 \pm 18.3$  cm/min. To quantify locomotion-associated  $\text{Ca}^{2+}$  transients, the change in position was calculated for time windows of three seconds. All transients whose peak occurred within  $\pm 6$  s of a period of locomotion with a speed higher than 1 cm/s were included in the analysis.

## QUANTIFICATION AND STATISTICAL ANALYSIS

Numerical data are reported as mean  $\pm$  s.e.m. with  $n$  being the number of samples. In figures, asterisks indicate statistical significance (details in figure, figure legend or text). In Box and Whisker plots the box indicates the 25<sup>th</sup> and 75<sup>th</sup> percentile, whiskers 5% and 95% percentiles, the horizontal line in the box the median and the filled circle the mean. Individual data points are displayed as hollow circles on top of the Box and Whisker plot. Student's  $t$  tests, Spearman's rank correlation (Spearman rank correlation coefficient,  $R$ ) and other statistical tools were used as indicated and performed in MATLAB (Mathworks) and Origin (OriginLab). Only two-sided tests were used.  $p$  represents the level of significance. Significance levels are indicated in figures by asterisks (\*  $p < 0.05$ , \*\*  $p < 0.01$ , \*\*\*  $p < 0.001$ ) unless stated otherwise. 'n' indicates the number of independent samples and refers to, unless indicated otherwise, to the number of individual astrocyte recordings. For acute slices, on average one recording was performed per slice and one to two successful recordings were obtained per animal.

To establish the dependence of astrocytic  $[\text{Ca}^{2+}]$  transient peaks and amplitudes on the local basal  $[\text{Ca}^{2+}]$  within individual cells, a measure of correlation is needed. Since the exact mathematical relationship between these parameters is not known *a priori* and may also differ between cells, a non-parametric approach was required. We used Spearman's rank correlation coefficient ( $R$ ) to extract a single and unbiased measure that can be used across different cells, techniques and preparations. In this analysis, Spearman's  $R$  is the biological relevant statistical unit (e.g., in an individual cell). It is a dimensionless variable reporting the degree of x-y correlation. In our case, it captures how well the relationship between the basal  $[\text{Ca}^{2+}]$  and the peak/amplitude of  $\text{Ca}^{2+}$  transients can be described using a monotonic function (+1 = always increases with resting  $[\text{Ca}^{2+}]$ , -1 = always decreases with resting  $[\text{Ca}^{2+}]$ ). See Figures 1F and 3B for examples. This measure isolates the overall dependence of peak and amplitude on resting  $[\text{Ca}^{2+}]$  and enabled us to compare different cells irrespective of the precise values, which can vary considerably from one cell to another. The overall average dependence of peak and amplitude on resting  $[\text{Ca}^{2+}]$  across a set of cells was then calculated as the mean  $\pm$  s.e.m. and displayed together with individual data points in boxplots (see above and Figures 1G, 2E, 3C, 3E–3H, 4B, 4C, 5C, and 6E). Two-tailed, one population Student's  $t$  tests versus zero were used to establish if Spearman rank correlation coefficients across the entire population of recordings were significantly different from zero.

Estimates for the calculations presented in Figure S4 were obtained from the literature (De Young and Keizer, 1992; Höfer et al., 2002; Patrushev et al., 2013). In image panels not showing a color scale for  $\text{Ca}^{2+}$  concentrations, fluorescence intensities are color-coded using ImageJ's color lookup tables (*red hot* and *green fire blue*, see Figure 5 for an example).

## DATA AND CODE AVAILABILITY

The datasets and custom code supporting the current study have not been deposited in a public repository but are available upon reasonable request from the corresponding author.

**Cell Reports, Volume 30**

**Supplemental Information**

**Local Resting Ca<sup>2+</sup> Controls**

**the Scale of Astroglial Ca<sup>2+</sup> Signals**

**Claire M. King, Kirsten Bohmbach, Daniel Minge, Andrea Delekate, Kaiyu Zheng, James Reynolds, Cordula Rakers, Andre Zeug, Gabor C. Petzold, Dmitri A. Rusakov, and Christian Henneberger**

**Figure S1**

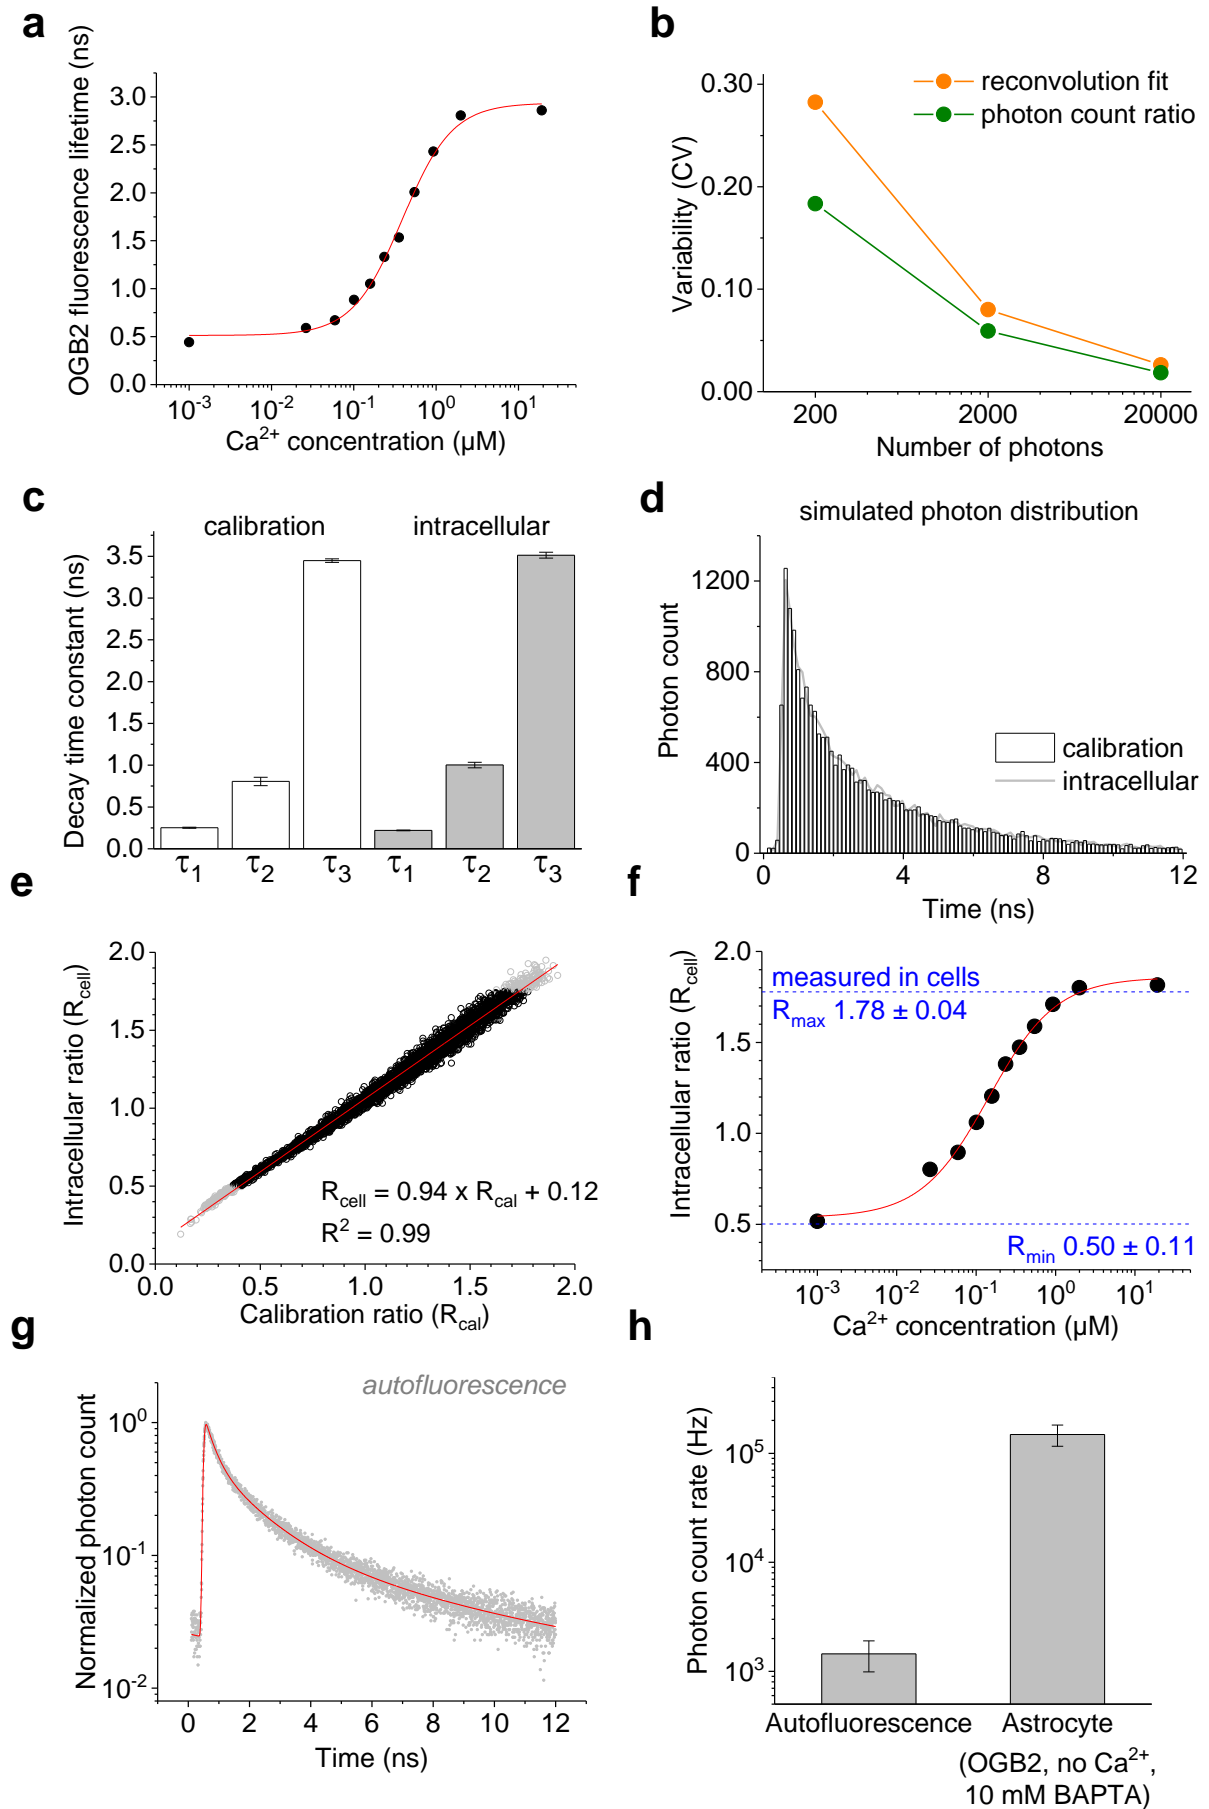

**FLIM data analysis: comparison of reconvolution fitting and photon count ratios, comparison of OGB2 fluorescence decay between cuvette calibration and intracellular recordings, negligible contribution of auto-fluorescence to FLIM Ca<sup>2+</sup> measurements (related to Figure 1).**

**a)** In addition to analysing data using photon count ratios (Fig. 1a-b), reconvolution fitting of FLIM calibration data was performed for comparison. Lifetime data (Fig. 1a, time-resolved OGB2 fluorescence) was approximated with a triple exponential decay function convolved with the instrument response function (IRF) of the imaging system. For each [Ca<sup>2+</sup>], the amplitude-weighted average fluorescence decay time constant was calculated. The relationship between this time constant and [Ca<sup>2+</sup>] was approximated by a Hill function ( $R^2 = 0.99$ ).

**b)** The sensitivity of both methods to the number of measured photon detection times was quantified. For this test, lifetime data sets were generated by random sampling of 200, 2000 or 20000 photon detection times from a reference lifetime calibration measurement and each data set was analysed using both methods (1000 data sets for each number of photon detection times). The coefficients of variation (CV) of the amplitude-weighted decay time constant and the photon count ratios were calculated across the data sets for 200, 2000 and 20000 sampled photon detection times. Intuitively, the variability of analysis results decreased the more photon detection times were sampled to build a lifetime curve. Especially for fewer photon detection times, the CV of photon count ratios was smaller than the CV of time constants. Thus, analysis of photon count ratios provides more stable results when few photon detection times are available for analysis.

**c)** The time-resolved OGB2 fluorescence decay was iteratively fitted by reconvolution of a triple-exponential decay function with the IRF (see also Material and Methods). Slightly different decay time constants ( $\tau_{1...3}$ ) were obtained from calibration data and intracellular recordings ( $n = 7$  for cuvette calibrations and 13 intracellular recordings from astrocytes, respectively).

**d)** The significance of the lifetime component differences was estimated. Experimental fluorescence decay profiles were simulated by randomly choosing the three amplitudes of individual components and convolving the resulting triple-exponential decay function with the IRF. The convolved result was then transformed into a probability density function, which gives the probability distribution of photon detection times for the chosen set of component amplitudes. A simulated fluorescence profile was then obtained by randomly sampling 20000 photons from this distribution. For a given set of component amplitudes, this was performed with the lifetime decay time constants for cuvette calibration (bars) and intracellular recordings (line).

**e)** A total number of 10000 photon distribution pairs were simulated (black circles for experimentally observed range and grey circles outside). A strong linear relationship between the simulated intracellular and cuvette calibration photon count ratios was observed. This linear relationship was used to transform the ratio obtained from intracellular recordings to an equivalent ratio from the cuvette calibration and, thus, for conversion of experimentally observed photon count ratios into Ca<sup>2+</sup> concentrations.

**f)** The relationship between  $[Ca^{2+}]$  and intracellularly measured photon count ratio is displayed. The minimum ( $R_{min}$ ) and maximum ( $R_{max}$ ) were verified experimentally. For  $R_{min}$ , 10 mM BAPTA were added to the intracellular solution ( $n = 3$  astrocytes). For  $R_{max}$ , 10 mM BAPTA and 10 mM  $CaCl_2$  were added to the intracellular solution (saturating free  $Ca^{2+}$  of  $19.2 \mu M$ ,  $n = 4$ ). Note the match between the experimentally determined range and the calibration.

**g)** A number of molecules present in brain tissue can fluoresce in response to two-photon excitation. We tested if such autofluorescence contributes significantly to our measurements by imaging tissue at comparable depth, laser power and imaging settings ( $n = 3$ ). An example of the observed time-resolved autofluorescence is shown (grey dots) together by its approximation by reconvolution fitting (triple exponential decay). The amplitude-weighted average lifetime was  $0.96 \pm 0.076$  ns ( $n = 3$ ).

**h)** To estimate the contribution of autofluorescence to  $[Ca^{2+}]$  measurements, we compared the rate at which autofluorescence photons were detected with the rate from otherwise identical experiments in which astrocytes were filled with OGB2, the  $Ca^{2+}$  buffer BAPTA (10 mM) without any added  $Ca^{2+}$ . Under these conditions of minimal OGB2 fluorescence, the detection rate of autofluorescence photons was two orders of magnitude lower than in astrocyte recordings indicating that the contribution of autofluorescence is negligible. To quantify the error introduced into  $[Ca^{2+}]$  measurements by autofluorescence we generated synthetic lifetime curves (random photon detection time sampling, see above) of OGB2 for  $[Ca^{2+}] = 101$  nM and added similarly generated autofluorescence with 100x fewer photon detection times. The error was then estimated by analysing  $[Ca^{2+}]$  using photon count ratios for generated OGB2 and OGB2+autofluorescence lifetime profiles. It was  $-1.1 \pm 0.83$  % ( $n = 100$ ).

**Figure S2**

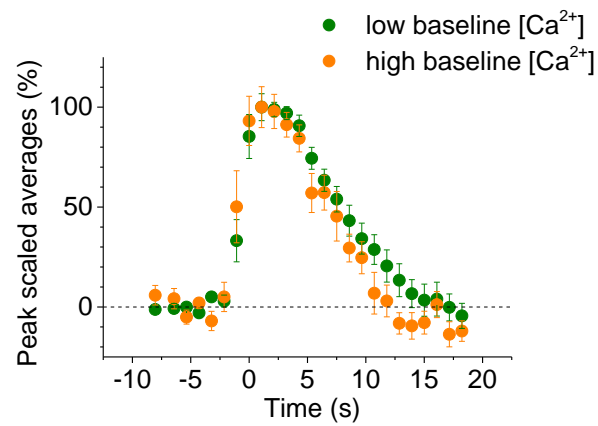

**Kinetics of DHPG-induced Ca<sup>2+</sup> transients are not controlled by resting [Ca<sup>2+</sup>] (related to Figure 1).**

Ca<sup>2+</sup> transient kinetics were analysed for the data from Fig. 1. For each cell, [Ca<sup>2+</sup>] transients from ROIs with baseline [Ca<sup>2+</sup>] below mean (low baseline [Ca<sup>2+</sup>], green) and above (high baseline [Ca<sup>2+</sup>], orange) were averaged and then peak-scaled. These were averaged across all recordings (n = 11).

**Figure S3**

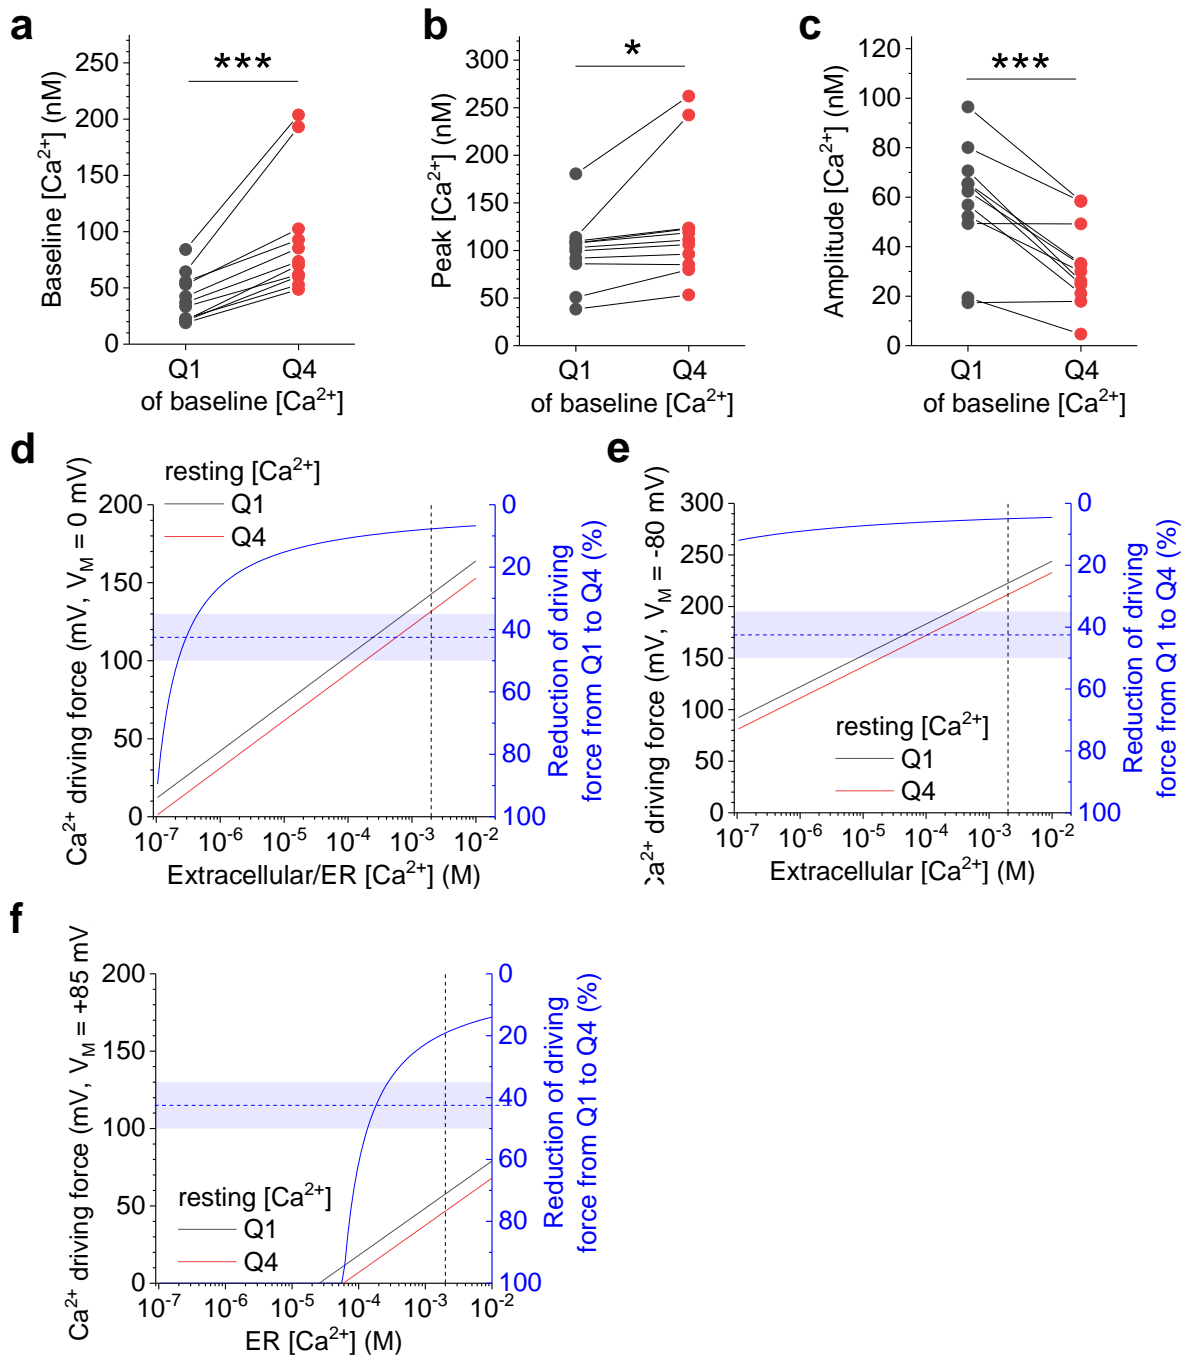

**Comparison of  $[Ca^{2+}]$  transient properties and  $Ca^{2+}$  driving forces between low- and high-baseline regions of interest (related to Figure 1).**

To confirm findings obtained using Spearman rank coefficients ( $R_s$ ), we directly compared peak, amplitude and baseline of DHPG-induced  $[Ca^{2+}]$  transients (same data as in Fig. 1) in regions of interest (ROIs) with low and high baseline  $[Ca^{2+}]$ . For each cell ( $n = 11$ ), ROIs with a baseline  $[Ca^{2+}]$  in the 1<sup>st</sup> quartile (Q1) and in the 4<sup>th</sup> quartile (Q4) were identified. We then calculated for each cell the average baseline, peak and amplitude of  $[Ca^{2+}]$  transients in both

quartiles (Q1 and Q4). Please note, that in this analysis 50% of ROIs are not taken into account by definition.

**a)** As expected, the baseline is significantly higher in Q4 compared to Q1 ( $p = 5.3 \times 10^{-4}$ , paired Student's t-test).

**b)** The peak  $[Ca^{2+}]$  is significantly higher when the baseline  $[Ca^{2+}]$  is high ( $p = 0.041$ , paired Student's t-test).

**c)** The amplitude of  $[Ca^{2+}]$  is significantly lower when the baseline  $[Ca^{2+}]$  is high ( $p = 2.8 \times 10^{-4}$ , paired Student's t-test).

**d)** Estimate of the  $Ca^{2+}$  driving force for Q1 and Q4 baseline  $[Ca^{2+}]$  and their ratio, and comparison to experimentally observed reduction of  $[Ca^{2+}]$  transient amplitudes. We calculated the Nernst equilibrium potential for a range of  $Ca^{2+}$  concentrations outside of the astrocyte cytosol (extracellular or endoplasmic reticulum, ER) (black left y-axis) for the average baseline  $[Ca^{2+}]$  in Q1 ( $41.3 \pm 6.36$  nM, black line) and in Q4 ( $95.0 \pm 16.2$  nM, red line) and subtracted the membrane potential ( $V_M$ , 0 mV here). The reduction of the driving force from Q1 to Q4 is shown in percent (blue line and right blue y-axis). At the nominal extracellular  $[Ca^{2+}]$  of 2 mM, the change of the equilibrium potential from Q1 to Q4 is  $< 10\%$  (dashed black vertical line). The horizontal blue dashed line and the transparent blue bar indicate the experimentally observed  $[Ca^{2+}]$  transient amplitude reduction (by  $42.5 \pm 7.70\%$ ).

Under these conditions and assuming that  $Ca^{2+}$  influx into the astrocyte cytosol is directly proportional to the driving force, the observed reduction of  $Ca^{2+}$  transient amplitudes could be explained by a decrease of the driving force if  $[Ca^{2+}]$  outside the cytosol (extracellular space or ER) was as low as  $\sim 200$ -400 nM (intersection of dashed and solid blue lines).

**e)** Comparison of driving forces for  $Ca^{2+}$  across the astroglial plasma membrane at a transmembrane potential of -80 mV. The difference between driving forces between Q1 and Q4 basal  $[Ca^{2+}]$  is  $< 15\%$  over the entire range of calculated extracellular  $[Ca^{2+}]$ . Thus, the decrease of the  $Ca^{2+}$  driving force at high basal cytosolic  $[Ca^{2+}]$  cannot explain the reduction of amplitudes if they are generated entirely by  $Ca^{2+}$  entry from extracellular space.

**f)** Precise measurements of the astroglial ER membrane potentials are not available to our knowledge. Estimates of the ER membrane potential  $V_{ER}$  are commonly based on theoretical considerations and range from, more recently, close to zero (Lam and Galione, 2013) to previously  $\sim -74$  to  $-90$  mV (ER-negative) (Burdakov et al., 2005). If  $V_{ER}$  is close to zero, an ER  $[Ca^{2+}]$  of 200-400 nM would be required to explain the amplitude decrease (see **d**). If  $V_{ER}$  is close to +85 mV however (cytosol positive, ER negative), a store  $[Ca^{2+}]$  of 200-400  $\mu$ M can explain the reduced amplitudes at high basal  $[Ca^{2+}]$ , which is in line with estimates of ER  $[Ca^{2+}]$  of 100-800  $\mu$ M (Burdakov et al., 2005; Lam and Galione, 2013).



Figure S4

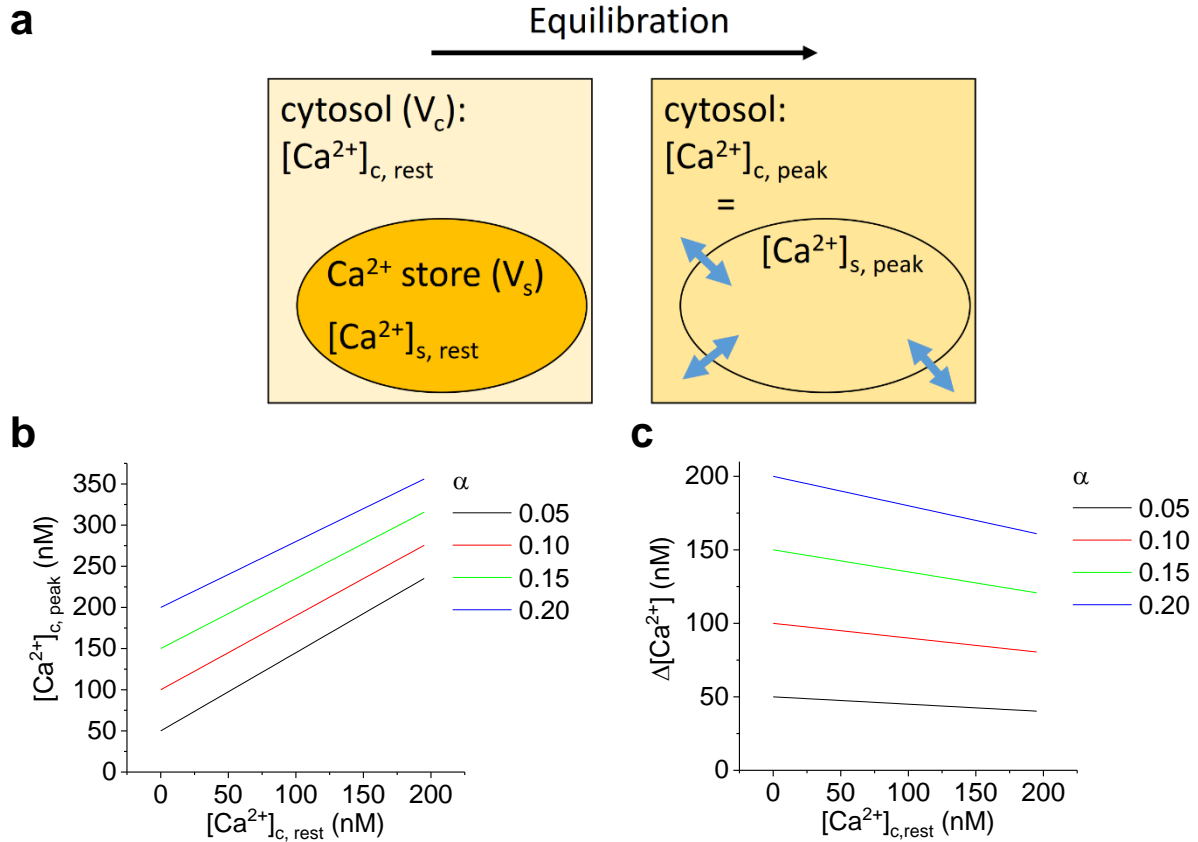

**Equilibration of  $Ca^{2+}$  between cytosol and  $Ca^{2+}$ -stores during astroglial  $Ca^{2+}$  transients reproduces the experimentally observed dependence of transient peak  $[Ca^{2+}]$  and amplitude on resting  $[Ca^{2+}]$  (related to Figures 1-4).**

**a)** Simplified astroglial compartment containing a  $Ca^{2+}$  store. The cytosolic  $[Ca^{2+}]$  after equilibration between both compartments, at the  $Ca^{2+}$  transient peak, is given by

$$[Ca^{2+}]_{c, peak} = (V_c \times [Ca^{2+}]_{c, rest} + V_s \times [Ca^{2+}]_{s, rest}) / (V_c + V_s),$$

where the subscripts c and s denote the cytosolic and  $Ca^{2+}$ -store volume and  $[Ca^{2+}]$ , respectively.  $Ca^{2+}$  extrusion mechanisms are ignored for the sake of simplicity. We next define  $\alpha$  to be the fraction of the total volume ( $V = V_c + V_s$ ) occupied by  $Ca^{2+}$  stores. Substituting  $V_s$  by  $\alpha \times V$  and  $V_c$  by  $(1 - \alpha) \times V$  yields

$$[Ca^{2+}]_{c, peak} = (1 - \alpha) \times [Ca^{2+}]_{c, rest} + \alpha \times [Ca^{2+}]_{s, rest}.$$

The  $[Ca^{2+}]$  transient amplitude is then given by

$$\Delta[Ca^{2+}]_c = [Ca^{2+}]_{c, peak} - [Ca^{2+}]_{c, rest} = \alpha \times [Ca^{2+}]_{s, rest} - \alpha \times [Ca^{2+}]_{c, rest}.$$

**b)** Relationship between the cytosolic resting  $[Ca^{2+}]_{c, rest}$  and the  $Ca^{2+}$  transient peak  $[Ca^{2+}]$  over a range of  $Ca^{2+}$  store volume fractions ( $\alpha$ , 0.05 - 0.20) (De Young and Keizer, 1992; Höfer et al., 2002; Patrushev et al., 2013) and assuming a store  $[Ca^{2+}]$  of 1  $\mu M$ .

**c)** Same as **b** for the  $\text{Ca}^{2+}$  transient amplitude. See Fig. 1 for comparison. Note that the slope is set by the  $\text{Ca}^{2+}$  store volume fraction. As a consequence, the strength of the negative correlation between resting  $[\text{Ca}^{2+}]$  and  $[\text{Ca}^{2+}]$  transient amplitude is expected to vary within a single astrocyte depending on the local abundance of  $\text{Ca}^{2+}$  stores.

**Figure S5**

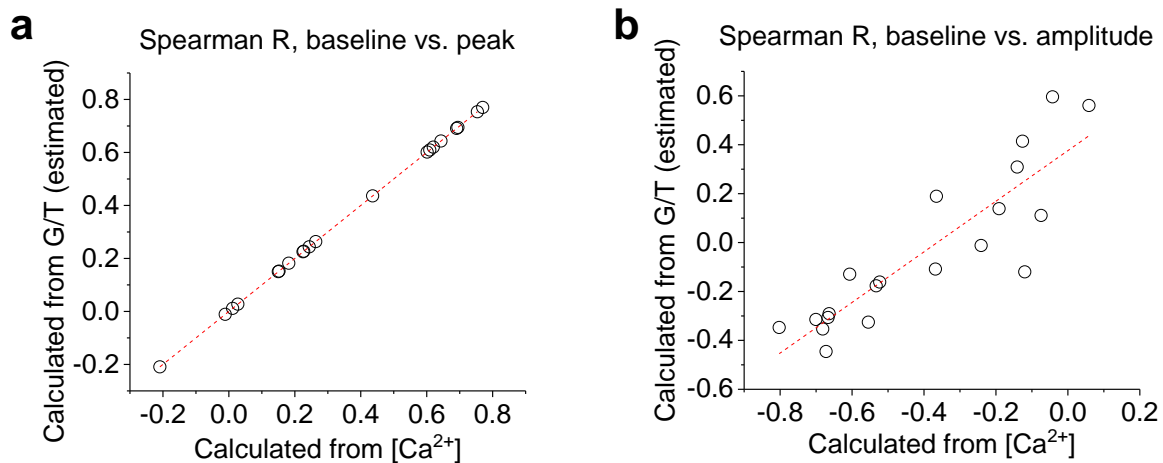

**Correction of Spearman correlations obtained from recordings using GCaMP5g (related to Figure 4).**

The fluorescence intensity of GCaMP5g is non-linearly correlated with  $[Ca^{2+}]$ . Its dependence on  $[Ca^{2+}]$  has been approximated with a Hill function with a  $K_d$  of 460 nM and a Hill coefficient of 2.5 (Akerboom et al., 2012). How this nonlinearity affects Spearman rank correlations between baseline and amplitude/peak of  $Ca^{2+}$  transients was investigated as follows. For each  $[Ca^{2+}]$  transient in each FLIM recording of Fig. 1 and 3, the corresponding fraction of  $Ca^{2+}$ -bound GCaMP5G was calculated for the baseline and peak  $[Ca^{2+}]$  of the transient. These fractions are linearly correlated with the corresponding fluorescence intensity ratio of GCaMP5G/tdTomato (G/T) within a single experiment and cell. The amplitude ( $\Delta G/T$ ) of each event was calculated as the difference between peak G/T and baseline G/T. We then calculated Spearman Rs between baseline (G/T) and peak (G/T) and between baseline (G/T) and amplitude ( $\Delta G/T$ ) and compared these to the Spearman Rs obtained from direct  $[Ca^{2+}]$  measurements.

**a)** For correlations between baseline and peak, we observed a direct linear dependence between the Spearman R's obtained from estimated G/T data and  $[Ca^{2+}]$  data ( $n = 20$ ,  $R^2 = 1$ , slope = 1, y-intercept = 0). Therefore, no corrections are needed for Spearman rank correlation coefficients obtained between baseline G/T and peak G/T.

**b)** For correlations between baseline and amplitude, we again obtained a direct linear dependence between Spearman Rs calculated from estimated G/T data and  $[Ca^{2+}]$  ( $n = 20$ ,  $R^2 = 0.78$ ). The y-intercept differed significantly from zero (y-intercept =  $0.38 \pm 0.062$ ,  $p = 1.1 \times 10^{-5}$ ) and the slope was  $1.03 \pm 0.13$ . Therefore, we corrected Spearman Rs calculated between baseline and amplitude in GCaMP5g/tdTomato recordings by subtracting 0.38 in order to account for the non-linear dependence of GCaMP5g fluorescence on  $[Ca^{2+}]$ .

Figure S6

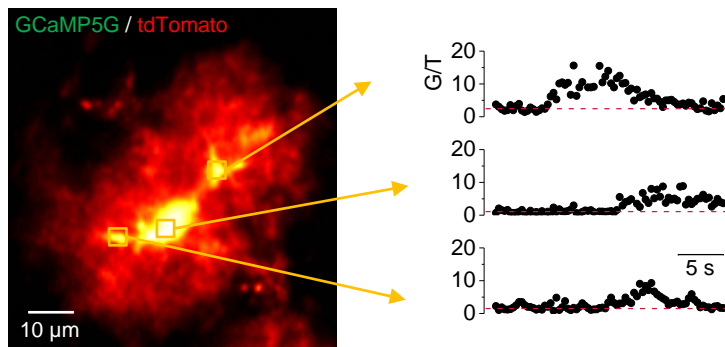

Second example of an *in vivo* recording in awake animals (related to Figure 6).

Please see legend of Fig. 6 for details.
